# Supplementary material
Source: MDPI journal article supplement (https://www.mdpi.com/2673-1924/3/2/16)
Supplement: s1 [file s1]

**Supplementary Table S1**

Checklist of 271 specimens of octocorals in the Equatorial Front. Each sample correspond to the occurrences of *Muricea* and *Leptogorgia* in the coastal provinces from 1982 to 2018. The records belong to the Museum of Zoology Q-CAZ of the Pontifical Catholic University of Ecuador (PUCE) and the repository of the National Center for Aquaculture and Marine Research (CENAIM).

| Sample  | Voucher    | Coordinate X | Coordinate Y | Province    | Locality           | Locality Code | Date       | Species                 | Depth   |
|---------|------------|--------------|--------------|-------------|--------------------|---------------|------------|-------------------------|---------|
| PUCE_1  | NO VOUCHER | -80,9081958  | -2,21969021  | Santa Elena | Libertad           | 43            | 22/01/1992 | <i>Leptogorgia alba</i> | NO DATA |
| PUCE_2  | NO VOUCHER | -80,0618378  | 0,06412151   | Manabi      | Pedernales         | 18            | 02/11/2002 | <i>Leptogorgia alba</i> | NO DATA |
| PUCE_3  | NO VOUCHER | -79,5636106  | 0,99444465   | Esmeraldas  | Playa de Camarones | 3             | 03/11/2011 | <i>Leptogorgia alba</i> | NO DATA |
| PUCE_4  | NO VOUCHER | -79,5627776  | 0,99472195   | Esmeraldas  | Playa de Camarones | 3             | 20/11/2010 | <i>Leptogorgia alba</i> | NO DATA |
| PUCE_5  | NO VOUCHER | -79,8381571  | 0,8797593    | Esmeraldas  | Atacames           | 7             | 19/12/1992 | <i>Leptogorgia alba</i> | NO DATA |
| PUCE_6  | NO VOUCHER | -79,6527022  | 0,96919691   | Esmeraldas  | Rocafuerte         | 4             | 01/01/1987 | <i>Leptogorgia alba</i> | NO DATA |
| PUCE_7  | NO VOUCHER | -80,0602687  | 0,06386005   | Manabi      | Pedernales         | 18            | 02/11/2002 | <i>Leptogorgia alba</i> | NO DATA |
| PUCE_8  | NO VOUCHER | -79,1666664  | 1,10000024   | Esmeraldas  | Las Peñas          | 2             | 18/01/2003 | <i>Leptogorgia alba</i> | NO DATA |
| PUCE_9  | NO VOUCHER | -79,8754215  | 0,86783575   | Esmeraldas  | Sua                | 8             | 22/12/2002 | <i>Leptogorgia alba</i> | NO DATA |
| PUCE_10 | NO VOUCHER | -80,0954981  | 0,7177373    | Esmeraldas  | Playa Quingue      | 15            | 11/10/2014 | <i>Leptogorgia alba</i> | NO DATA |
| PUCE_11 | NO VOUCHER | -80,0492232  | 0,48131395   | Esmeraldas  | Portete            | 17            | 11/01/2004 | <i>Leptogorgia alba</i> | NO DATA |
| PUCE_12 | NO VOUCHER | -79,8750769  | 0,86542401   | Esmeraldas  | Sua                | 8             | 20/08/1987 | <i>Leptogorgia alba</i> | NO DATA |
| PUCE_13 | NO VOUCHER | -79,9252781  | 0,84750024   | Esmeraldas  | Same               | 9             | 23/01/1993 | <i>Leptogorgia alba</i> | NO DATA |
| PUCE_14 | NO VOUCHER | -80,5117992  | -0,75394836  | Manabi      | San Clemente       | 24            | 28/12/1985 | <i>Leptogorgia alba</i> | NO DATA |
| PUCE_15 | NO VOUCHER | -79,8371233  | 0,88079296   | Esmeraldas  | Atacames           | 7             | 01/01/1987 | <i>Leptogorgia alba</i> | NO DATA |
| PUCE_16 | NO VOUCHER | -80,0072226  | 0,81766382   | Esmeraldas  | Playa Escondida    | 14            | 30/10/2010 | <i>Leptogorgia alba</i> | NO DATA |
| PUCE_17 | NO VOUCHER | -79,9252781  | 0,84750024   | Esmeraldas  | Same               | 9             | 18/01/1987 | <i>Leptogorgia alba</i> | NO DATA |
| PUCE_18 | NO VOUCHER | -79,1664125  | 1,09957436   | Esmeraldas  | Las Peñas          | 2             | 23/12/2002 | <i>Leptogorgia alba</i> | NO DATA |
| PUCE_19 | NO VOUCHER | -80,7499996  | -1,35000028  | Manabi      | Puerto Cayo        | 31            | 27/12/2002 | <i>Leptogorgia alba</i> | NO DATA |
| PUCE_20 | NO VOUCHER | -79,9252781  | 0,84750024   | Esmeraldas  | Same               | 9             | 18/01/1987 | <i>Leptogorgia alba</i> | NO DATA |

| Sample  | Voucher    | Coordinate X | Coordinate Y | Province    | Locality           | Locality Code | Date       | Species                 | Depth   |
|---------|------------|--------------|--------------|-------------|--------------------|---------------|------------|-------------------------|---------|
| PUCE_21 | NO VOUCHER | -79,8367787  | 0,87975932   | Esmeraldas  | Atacames           | 7             | 30/12/1996 | <i>Leptogorgia alba</i> | NO DATA |
| PUCE_22 | NO VOUCHER | -79,9252781  | 0,84750024   | Esmeraldas  | Same               | 9             | 28/12/1991 | <i>Leptogorgia alba</i> | NO DATA |
| PUCE_23 | NO VOUCHER | -79,8385016  | 0,87975932   | Esmeraldas  | Atacames           | 7             | 18/01/1987 | <i>Leptogorgia alba</i> | NO DATA |
| PUCE_24 | NO VOUCHER | -80,0521929  | 0,4770581    | Esmeraldas  | Portete            | 17            | 11/01/2004 | <i>Leptogorgia alba</i> | NO DATA |
| PUCE_25 | NO VOUCHER | -79,5636106  | 0,99444465   | Esmeraldas  | Playa de Camarones | 3             | 03/11/2011 | <i>Leptogorgia alba</i> | NO DATA |
| PUCE_26 | NO VOUCHER | -80,7926962  | -1,48579304  | Manabi      | Tortuguita         | 32            | 13/10/2002 | <i>Leptogorgia alba</i> | NO DATA |
| PUCE_27 | NO VOUCHER | -79,8179923  | 0,89347364   | Esmeraldas  | Tonsupa            | 5             | 04/01/1993 | <i>Leptogorgia alba</i> | NO DATA |
| PUCE_28 | NO VOUCHER | -80,7499996  | -1,35000028  | Manabi      | Puerto Cayo        | 31            | 18/01/2003 | <i>Leptogorgia alba</i> | NO DATA |
| PUCE_29 | NO VOUCHER | -79,9480557  | 0,82916626   | Esmeraldas  | Puerto Tonchigue   | 11            | 02/11/2010 | <i>Leptogorgia alba</i> | NO DATA |
| PUCE_30 | NO VOUCHER | -80,0545287  | 0,4722679    | Esmeraldas  | Portete            | 17            | 11/01/2004 | <i>Leptogorgia alba</i> | NO DATA |
| PUCE_31 | NO VOUCHER | -79,8795564  | 0,86955844   | Esmeraldas  | Sua                | 8             | 23/11/2000 | <i>Leptogorgia alba</i> | NO DATA |
| PUCE_32 | NO VOUCHER | -79,9252781  | 0,84750024   | Esmeraldas  | Same               | 9             | 18/01/1987 | <i>Leptogorgia alba</i> | NO DATA |
| PUCE_33 | NO VOUCHER | -79,5636106  | 0,99444465   | Esmeraldas  | Playa de Camarones | 9             | 03/11/2011 | <i>Leptogorgia alba</i> | NO DATA |
| PUCE_34 | NO VOUCHER | -78,8606366  | 1,2606111    | Esmeraldas  | San Lorenzo        | 1             | 18/01/2003 | <i>Leptogorgia alba</i> | NO DATA |
| PUCE_35 | NO VOUCHER | -79,876667   | 0,86611113   | Esmeraldas  | Sua                | 8             | 18/01/2004 | <i>Leptogorgia alba</i> | NO DATA |
| PUCE_36 | NO VOUCHER | -80,9069657  | -2,21922924  | Santa Elena | Libertad           | 43            | 23/01/1993 | <i>Leptogorgia alba</i> | NO DATA |
| PUCE_37 | NO VOUCHER | -79,8771444  | 0,86955844   | Esmeraldas  | Sua                | 8             | 20/11/2000 | <i>Leptogorgia alba</i> | NO DATA |
| PUCE_38 | NO VOUCHER | -79,8148542  | 0,8919047    | Esmeraldas  | Playa Ancha        | 6             | 15/12/1989 | <i>Leptogorgia alba</i> | NO DATA |
| PUCE_39 | NO VOUCHER | -80,4524995  | -0,4797225   | Manabi      | Canoa              | 20            | 30/10/2010 | <i>Leptogorgia alba</i> | NO DATA |
| PUCE_40 | NO VOUCHER | -80,0502877  | 0,47777202   | Esmeraldas  | Portete            | 17            | 11/01/2004 | <i>Leptogorgia alba</i> | NO DATA |
| PUCE_41 | NO VOUCHER | -80,8150345  | -1,56067182  | Manabi      | Puerto Lopez       | 34            | 27/12/2003 | <i>Leptogorgia alba</i> | NO DATA |
| PUCE_42 | NO VOUCHER | -80,4166701  | -0,59999989  | Manabi      | Bahia de Caraquez  | 21            | 09/08/1986 | <i>Leptogorgia alba</i> | NO DATA |
| PUCE_43 | NO VOUCHER | -80,4524995  | -0,4797225   | Manabi      | Canoa              | 20            | 29/12/1992 | <i>Leptogorgia alba</i> | NO DATA |
| PUCE_44 | NO VOUCHER | -80,4524995  | -0,4797225   | Manabi      | Canoa              | 20            | 11/11/1983 | <i>Leptogorgia alba</i> | NO DATA |

| Sample  | Voucher    | Coordinate X | Coordinate Y | Province    | Locality          | Locality Code | Date       | Species                 | Depth   |
|---------|------------|--------------|--------------|-------------|-------------------|---------------|------------|-------------------------|---------|
| PUCE_45 | NO VOUCHER | -79,9467212  | 0,8312419    | Esmeraldas  | Tonchigue         | 10            | 30/12/1999 | <i>Leptogorgia alba</i> | NO DATA |
| PUCE_46 | NO VOUCHER | -80,9092722  | -2,21999751  | Santa Elena | Libertad          | 43            | 01/01/1993 | <i>Leptogorgia alba</i> | NO DATA |
| PUCE_47 | NO VOUCHER | -80,7499996  | -1,35000028  | Manabi      | Puerto Cayo       | 31            | 19/01/2003 | <i>Leptogorgia alba</i> | NO DATA |
| PUCE_48 | NO VOUCHER | -80,7305001  | -0,93920028  | Manabi      | Playa Murcielago  | 27            | 26/12/1996 | <i>Leptogorgia alba</i> | NO DATA |
| PUCE_49 | NO VOUCHER | -79,8174693  | 0,89295065   | Esmeraldas  | Tonsupa           | 5             | 26/12/2002 | <i>Leptogorgia alba</i> | NO DATA |
| PUCE_50 | NO VOUCHER | -79,9252781  | 0,84750024   | Esmeraldas  | Same              | 9             | 30/10/2010 | <i>Leptogorgia alba</i> | NO DATA |
| PUCE_51 | NO VOUCHER | -80,7299871  | -0,93847573  | Manabi      | Manta             | 26            | 11/08/2012 | <i>Leptogorgia alba</i> | NO DATA |
| PUCE_52 | NO VOUCHER | -80,4627779  | -0,45166705  | Manabi      | Canoa             | 20            | 01/11/2010 | <i>Leptogorgia alba</i> | NO DATA |
| PUCE_53 | NO VOUCHER | -81,0999999  | -1,26666695  | Manabi      | Isla de la Plata  | 30            | 27/12/2003 | <i>Leptogorgia alba</i> | NO DATA |
| PUCE_54 | NO VOUCHER | -79,8164233  | 0,89190467   | Esmeraldas  | Playa Ancha       | 6             | 30/12/1987 | <i>Leptogorgia alba</i> | NO DATA |
| PUCE_55 | NO VOUCHER | -80,4166701  | -0,59999989  | Manabi      | Bahia de Caraquez | 21            | 09/08/1986 | <i>Leptogorgia alba</i> | NO DATA |
| PUCE_56 | NO VOUCHER | -79,9480557  | 0,82916626   | Esmeraldas  | Puerto Tonchigue  | 11            | 01/11/2010 | <i>Leptogorgia alba</i> | NO DATA |
| PUCE_57 | NO VOUCHER | -80,0238888  | 0,5069445    | Esmeraldas  | Mompiche          | 16            | 18/10/2003 | <i>Leptogorgia alba</i> | NO DATA |
| PUCE_58 | NO VOUCHER | -80,8151114  | -1,56113296  | Manabi      | Puerto Lopez      | 34            | 27/12/2003 | <i>Leptogorgia alba</i> | NO DATA |
| PUCE_59 | NO VOUCHER | -79,8179923  | 0,89242764   | Esmeraldas  | Tonsupa           | 5             | 26/12/2002 | <i>Leptogorgia alba</i> | NO DATA |
| PUCE_60 | NO VOUCHER | -79,8148542  | 0,8919047    | Esmeraldas  | Tonsupa           | 5             | 26/12/2002 | <i>Leptogorgia alba</i> | NO DATA |
| PUCE_61 | NO VOUCHER | -79,9480557  | 0,82916626   | Esmeraldas  | Puerto Tonchigue  | 11            | 01/11/2010 | <i>Leptogorgia alba</i> | NO DATA |
| PUCE_62 | NO VOUCHER | -79,8190384  | 0,89085879   | Esmeraldas  | Tonsupa           | 5             | 20/11/2004 | <i>Leptogorgia alba</i> | NO DATA |
| PUCE_63 | NO VOUCHER | -80,8149576  | -1,56059497  | Manabi      | Puerto Lopez      | 34            | 27/12/2003 | <i>Leptogorgia alba</i> | NO DATA |
| PUCE_64 | NO VOUCHER | -79,8174693  | 0,88981282   | Esmeraldas  | Tonsupa           | 5             | 26/12/2002 | <i>Leptogorgia alba</i> | NO DATA |
| PUCE_65 | NO VOUCHER | -81,0999999  | -1,26666695  | Manabi      | Isla de la Plata  | 30            | 27/12/2003 | <i>Leptogorgia alba</i> | NO DATA |
| PUCE_66 | NO VOUCHER | -80,8156496  | -1,56151724  | Manabi      | Puerto Lopez      | 34            | 27/12/2003 | <i>Leptogorgia alba</i> | NO DATA |
| PUCE_67 | NO VOUCHER | -80,8155727  | -1,56151724  | Manabi      | Puerto Lopez      | 34            | 27/12/2003 | <i>Leptogorgia alba</i> | NO DATA |
| PUCE_68 | NO VOUCHER | -80,7666666  | -1,36666687  | Manabi      | Puerto Cayo       | 31            | 25/12/2002 | <i>Leptogorgia alba</i> | NO DATA |

| Sample  | Voucher    | Coordinate X | Coordinate Y | Province    | Locality          | Locality Code | Date       | Species                       | Depth   |
|---------|------------|--------------|--------------|-------------|-------------------|---------------|------------|-------------------------------|---------|
| PUCE_69 | NO VOUCHER | -79,8200844  | 0,88772111   | Esmeraldas  | Tonsupa           | 5             | 26/12/2002 | <i>Leptogorgia alba</i>       | NO DATA |
| PUCE_70 | NO VOUCHER | -79,8127622  | 0,89451948   | Esmeraldas  | Tonsupa           | 5             | 26/12/2002 | <i>Leptogorgia alba</i>       | NO DATA |
| PUCE_71 | NO VOUCHER | -80,7666666  | -1,36666687  | Manabi      | Puerto Cayo       | 31            | 25/12/2002 | <i>Leptogorgia alba</i>       | NO DATA |
| PUCE_72 | NO VOUCHER | -80,8159571  | -1,56174781  | Manabi      | Puerto Lopez      | 34            | 27/12/2003 | <i>Leptogorgia alba</i>       | NO DATA |
| PUCE_73 | NO VOUCHER | -79,8388462  | 0,88148203   | Esmeraldas  | Atacames          | 7             | 12/11/1987 | <i>Leptogorgia alba</i>       | NO DATA |
| PUCE_74 | NO VOUCHER | -80,7666666  | -1,36666687  | Manabi      | Puerto Cayo       | 31            | 21/12/1987 | <i>Leptogorgia alba</i>       | NO DATA |
| PUCE_75 | NO VOUCHER | -79,8138082  | 0,89295064   | Esmeraldas  | Tonsupa           | 5             | 26/12/2002 | <i>Leptogorgia alba</i>       | NO DATA |
| PUCE_76 | NO VOUCHER | -80,8141229  | -1,55959447  | Manabi      | Puerto Lopez      | 34            | 25/10/2001 | <i>Leptogorgia cuspidata</i>  | NO DATA |
| PUCE_77 | NO VOUCHER | -80,0236664  | 0,50732982   | Esmeraldas  | Mompiche          | 16            | 11/01/2003 | <i>Leptogorgia cuspidata</i>  | NO DATA |
| PUCE_78 | NO VOUCHER | -80,7558838  | -1,82910384  | Santa Elena | Monta?ita         | 37            | 30/12/1990 | <i>Leptogorgia cuspidata</i>  | NO DATA |
| PUCE_79 | NO VOUCHER | -80,7499996  | -1,35000028  | Manabi      | Puerto Cayo       | 31            | 19/01/2003 | <i>Leptogorgia cuspidata</i>  | NO DATA |
| PUCE_80 | NO VOUCHER | -80,8115449  | -0,95526358  | Manabi      | San Mateo         | 29            | 04/11/2010 | <i>Leptogorgia cuspidata</i>  | NO DATA |
| PUCE_81 | NO VOUCHER | -80,05024    | 0,82468281   | Esmeraldas  | Playa Galeras     | 12            | 24/10/2012 | <i>Leptogorgia cuspidata</i>  | NO DATA |
| PUCE_82 | NO VOUCHER | -80,7666666  | -1,36666687  | Manabi      | Puerto Cayo       | 31            | 10/11/2012 | <i>Leptogorgia cuspidata</i>  | NO DATA |
| PUCE_83 | NO VOUCHER | -80,4166701  | -0,59999989  | Manabi      | Bahia de Caraquez | 21            | 12/10/2013 | <i>Leptogorgia taboguilla</i> | NO DATA |
| PUCE_84 | NO VOUCHER | -79,8190384  | 0,89295061   | Esmeraldas  | Tonsupa           | 5             | 18/01/1992 | <i>Leptogorgia taboguilla</i> | NO DATA |
| PUCE_85 | NO VOUCHER | -80,4166701  | -0,59999989  | Manabi      | Bahia de Caraquez | 21            | 12/10/2013 | <i>Leptogorgia taboguilla</i> | NO DATA |
| PUCE_86 | NO VOUCHER | -79,8360896  | 0,87975928   | Esmeraldas  | Atacames          | 7             | 03/01/1987 | <i>Leptogorgia taboguilla</i> | NO DATA |
| PUCE_87 | NO VOUCHER | -79,8371233  | 0,87907026   | Esmeraldas  | Atacames          | 7             | 03/01/1987 | <i>Leptogorgia taboguilla</i> | NO DATA |
| PUCE_88 | NO VOUCHER | -79,8726649  | 0,86542401   | Esmeraldas  | Sua               | 8             | 20/08/1987 | <i>Leptogorgia taboguilla</i> | NO DATA |
| PUCE_89 | NO VOUCHER | -80,5120715  | -0,75331305  | Manabi      | San Clemente      | 24            | 20/11/2010 | <i>Leptogorgia obscura</i>    | NO DATA |
| PUCE_90 | NO VOUCHER | -79,8374679  | 0,87941481   | Esmeraldas  | Atacames          | 7             | 01/03/1984 | <i>Leptogorgia obscura</i>    | NO DATA |
| PUCE_91 | NO VOUCHER | -80,5120715  | -0,75399375  | Manabi      | San Clemente      | 24            | 01/08/1986 | <i>Leptogorgia obscura</i>    | NO DATA |
| PUCE_92 | NO VOUCHER | -80,3975528  | -2,63689584  | Santa Elena | Playas            | 44            | 22/11/1986 | <i>Leptogorgia obscura</i>    | NO DATA |

| Sample   | Voucher    | Coordinate X | Coordinate Y | Province    | Locality         | Locality Code | Date       | Species                    | Depth   |
|----------|------------|--------------|--------------|-------------|------------------|---------------|------------|----------------------------|---------|
| PUCE_93  | NO VOUCHER | -79,8398799  | 0,88010384   | Esmeraldas  | Atacames         | 7             | -          | <i>Leptogorgia obscura</i> | NO DATA |
| PUCE_94  | NO VOUCHER | -80,9707027  | -2,20259288  | Santa Elena | Salinas          | 42            | 04/02/2002 | <i>Leptogorgia obscura</i> | NO DATA |
| PUCE_95  | NO VOUCHER | -80,4562578  | -0,46807796  | Manabi      | Canoa            | 20            | 19/01/2003 | <i>Leptogorgia obscura</i> | NO DATA |
| PUCE_96  | NO VOUCHER | -79,8374679  | 0,87907027   | Esmeraldas  | Atacames         | 7             | 01/01/1987 | <i>Leptogorgia obscura</i> | NO DATA |
| PUCE_97  | NO VOUCHER | -80,7409624  | -1,35063679  | Manabi      | Puerto Cayo      | 31            | 23/12/2002 | <i>Leptogorgia obscura</i> | NO DATA |
| PUCE_98  | NO VOUCHER | -80,5121169  | -0,75390298  | Manabi      | San Clemente     | 24            | 28/12/1986 | <i>Leptogorgia obscura</i> | NO DATA |
| PUCE_99  | NO VOUCHER | -80,8349445  | -1,63286497  | Manabi      | Puerto Rico      | 35            | 28/12/1993 | <i>Leptogorgia obscura</i> | NO DATA |
| PUCE_100 | NO VOUCHER | -80,7499996  | -1,35000028  | Manabi      | Puerto Cayo      | 31            | 28/12/2002 | <i>Leptogorgia obscura</i> | NO DATA |
| PUCE_101 | NO VOUCHER | -80,3317408  | -0,1825857   | Esmeraldas  | Cabuyal          | 19            | 29/11/2002 | <i>Leptogorgia obscura</i> | NO DATA |
| PUCE_102 | NO VOUCHER | -80,5120261  | -0,7543114   | Manabi      | San Clemente     | 24            | 28/12/1985 | <i>Leptogorgia obscura</i> | NO DATA |
| PUCE_103 | NO VOUCHER | -80,5122757  | -0,75444754  | Manabi      | San Clemente     | 24            | 28/12/1986 | <i>Leptogorgia obscura</i> | NO DATA |
| PUCE_104 | NO VOUCHER | -80,7305001  | -0,93920028  | Manabi      | Playa Murcielago | 27            | 26/12/1996 | <i>Leptogorgia obscura</i> | NO DATA |
| PUCE_105 | NO VOUCHER | -80,7305001  | -0,93920028  | Manabi      | Playa Murcielago | 27            | 26/12/1996 | <i>Leptogorgia obscura</i> | NO DATA |
| PUCE_106 | NO VOUCHER | -80,4564702  | -0,46589804  | Manabi      | Canoa            | 20            | 12/01/2003 | <i>Leptogorgia obscura</i> | NO DATA |
| PUCE_107 | NO VOUCHER | -80,4551281  | -0,61925049  | Manabi      | Punta Bellaca    | 23            | 10/11/2010 | <i>Leptogorgia obscura</i> | NO DATA |
| PUCE_108 | NO VOUCHER | -79,8211304  | 0,88981291   | Esmeraldas  | Playa Ancha      | 6             | 30/12/1987 | <i>Leptogorgia obscura</i> | NO DATA |
| PUCE_109 | NO VOUCHER | -80,3997059  | -2,64058456  | Santa Elena | Playas           | 44            | 10/11/1986 | <i>Leptogorgia obscura</i> | NO DATA |
| PUCE_110 | NO VOUCHER | -80,7418081  | -1,34856145  | Manabi      | Puerto Cayo      | 31            | 04/01/2003 | <i>Leptogorgia obscura</i> | NO DATA |
| PUCE_111 | NO VOUCHER | -80,7305001  | -0,93920028  | Manabi      | Playa Murcielago | 27            | 26/12/1996 | <i>Leptogorgia obscura</i> | NO DATA |
| PUCE_112 | NO VOUCHER | -80,5382346  | -0,86221981  | Manabi      | Crucita          | 25            | 02/11/2003 | <i>Leptogorgia obscura</i> | NO DATA |
| PUCE_113 | NO VOUCHER | -79,8111931  | 0,89451951   | Esmeraldas  | Tonsupa          | 5             | 26/12/2002 | <i>Leptogorgia obscura</i> | NO DATA |
| PUCE_114 | NO VOUCHER | -79,8367788  | 0,8804484    | Esmeraldas  | Atacames         | 7             | 11/12/1987 | <i>Leptogorgia obscura</i> | NO DATA |
| PUCE_115 | NO VOUCHER | -80,5379623  | -0,86185679  | Manabi      | Crucita          | 25            | 02/11/2003 | <i>Leptogorgia obscura</i> | NO DATA |
| PUCE_116 | NO VOUCHER | -80,4514308  | -0,61021905  | Manabi      | Chirije          | 22            | 03/11/1997 | <i>Leptogorgia obscura</i> | NO DATA |

| Sample   | Voucher    | Coordinate X | Coordinate Y | Province    | Locality          | Locality Code | Date       | Species                          | Depth   |
|----------|------------|--------------|--------------|-------------|-------------------|---------------|------------|----------------------------------|---------|
| PUCE_117 | NO VOUCHER | -80,7531671  | -0,94437788  | Manabi      | Barbasquillo      | 28            | 31/10/2010 | <i>Leptogorgia obscura</i>       | NO DATA |
| PUCE_118 | NO VOUCHER | -80,3944756  | -2,6375128   | Santa Elena | Playas            | 44            | 22/11/1986 | <i>Leptogorgia obscura</i>       | NO DATA |
| PUCE_119 | NO VOUCHER | -80,3889429  | -2,64181788  | Santa Elena | Playas            | 44            | 26/12/2002 | <i>Leptogorgia obscura</i>       | NO DATA |
| PUCE_120 | NO VOUCHER | -80,0628153  | 0,06416594   | Manabi      | Pedernales        | 18            | 18/01/2003 | <i>Leptogorgia obscura</i>       | NO DATA |
| PUCE_121 | NO VOUCHER | -80,7499996  | -1,35000028  | Manabi      | Puerto Cayo       | 31            | 11/01/2003 | <i>Leptogorgia obscura</i>       | NO DATA |
| PUCE_122 | NO VOUCHER | -80,5122984  | -0,75494671  | Manabi      | San Clemente      | 24            | 28/12/1985 | <i>Leptogorgia obscura</i>       | NO DATA |
| PUCE_123 | NO VOUCHER | -80,4166701  | -0,59999989  | Manabi      | Bahia de Caraquez | 21            | 01/12/1986 | <i>Leptogorgia obscura</i>       | NO DATA |
| PUCE_124 | NO VOUCHER | -80,5123438  | -0,75544588  | Manabi      | San Clemente      | 24            | 20/11/2010 | <i>Leptogorgia aequatorialis</i> | NO DATA |
| PUCE_125 | NO VOUCHER | -80,4166701  | -0,59999989  | Manabi      | Bahia de Caraquez | 21            | 01/12/1986 | <i>Leptogorgia aequatorialis</i> | NO DATA |
| PUCE_126 | NO VOUCHER | -79,8096241  | 0,89556537   | Esmeraldas  | Tonsupa           | 5             | 29/11/2002 | <i>Leptogorgia aequatorialis</i> | NO DATA |
| PUCE_127 | NO VOUCHER | -80,4558335  | -0,6200003   | Manabi      | Punta Bellaca     | 23            | 20/11/2010 | <i>Leptogorgia aequatorialis</i> | NO DATA |
| PUCE_128 | NO VOUCHER | -80,4166701  | -0,59999989  | Manabi      | Bahia de Caraquez | 21            | 01/12/1986 | <i>Leptogorgia aequatorialis</i> | NO DATA |
| PUCE_129 | NO VOUCHER | -80,7499996  | -1,35000028  | Manabi      | Puerto Cayo       | 31            | 19/01/2003 | <i>Leptogorgia aequatorialis</i> | NO DATA |
| PUCE_130 | NO VOUCHER | -80,7305001  | -0,93920028  | Manabi      | Playa Murcielago  | 27            | 26/12/1996 | <i>Leptogorgia aequatorialis</i> | NO DATA |
| PUCE_131 | NO VOUCHER | -80,5123892  | -0,75530975  | Manabi      | San Clemente      | 24            | 28/12/1986 | <i>Leptogorgia aequatorialis</i> | NO DATA |
| PUCE_132 | NO VOUCHER | -80,7499996  | -1,35000028  | Manabi      | Puerto Cayo       | 31            | 28/12/2002 | <i>Leptogorgia aequatorialis</i> | NO DATA |
| PUCE_133 | NO VOUCHER | -80,5382346  | -0,86258284  | Manabi      | Crucita           | 25            | 02/11/2003 | <i>Leptogorgia aequatorialis</i> | NO DATA |
| PUCE_134 | NO VOUCHER | -80,7499996  | -1,35000028  | Manabi      | Puerto Cayo       | 31            | 28/12/2002 | <i>Leptogorgia aequatorialis</i> | NO DATA |
| PUCE_135 | NO VOUCHER | -80,7499996  | -1,35000028  | Manabi      | Puerto Cayo       | 31            | 28/12/2002 | <i>Leptogorgia aequatorialis</i> | NO DATA |
| PUCE_136 | NO VOUCHER | -80,7305001  | -0,93920028  | Manabi      | Playa Murcielago  | 27            | 26/12/1996 | <i>Leptogorgia aequatorialis</i> | NO DATA |
| PUCE_137 | NO VOUCHER | -80,7499996  | -1,35000028  | Manabi      | Puerto Cayo       | 31            | 01/12/2002 | <i>Muricea purpurea</i>          | NO DATA |
| PUCE_138 | NO VOUCHER | -80,7499996  | -1,35000028  | Manabi      | Puerto Cayo       | 31            | 18/01/2003 | <i>Muricea sp1</i>               | NO DATA |
| PUCE_139 | NO VOUCHER | -80,7499996  | -1,35000028  | Manabi      | Puerto Cayo       | 31            | 28/12/2002 | <i>Muricea sp1</i>               | NO DATA |
| PUCE_140 | NO VOUCHER | -79,9451522  | 0,83307234   | Esmeraldas  | Tonchigue         | 10            | 30/12/1999 | <i>Leptogorgia alba</i>          | NO DATA |

| Sample   | Voucher    | Coordinate X | Coordinate Y | Province    | Locality           | Locality Code | Date       | Species                      | Depth   |
|----------|------------|--------------|--------------|-------------|--------------------|---------------|------------|------------------------------|---------|
| PUCE_141 | NO VOUCHER | -79,9438446  | 0,83281084   | Esmeraldas  | Tonchigue          | 10            | 30/12/1999 | <i>Leptogorgia alba</i>      | NO DATA |
| PUCE_142 | NO VOUCHER | -79,9451522  | 0,83150345   | Esmeraldas  | Tonchigue          | 10            | 30/12/1999 | <i>Leptogorgia obscura</i>   | NO DATA |
| PUCE_143 | NO VOUCHER | -79,9422755  | 0,8333338    | Esmeraldas  | Tonchigue          | 10            | 30/12/1999 | <i>Muricea fruticosa</i>     | NO DATA |
| PUCE_144 | NO VOUCHER | -79,9430601  | 0,83385677   | Esmeraldas  | Tonchigue          | 10            | 30/12/1999 | <i>Leptogorgia alba</i>      | NO DATA |
| PUCE_145 | NO VOUCHER | -79,9472442  | 0,83124195   | Esmeraldas  | Tonchigue          | 10            | 30/12/1999 | <i>Leptogorgia alba</i>      | NO DATA |
| PUCE_146 | NO VOUCHER | -79,9480288  | 0,82915006   | Esmeraldas  | Tonchigue          | 10            | 30/12/1999 | <i>Leptogorgia cuspidata</i> | NO DATA |
| PUCE_147 | NO VOUCHER | -79,9448907  | 0,83228783   | Esmeraldas  | Tonchigue          | 10            | 30/12/1999 | <i>Muricea purpurea</i>      | NO DATA |
| PUCE_148 | NO VOUCHER | -79,9485518  | 0,83045749   | Esmeraldas  | Tonchigue          | 10            | 30/12/1999 | <i>Muricea purpurea</i>      | NO DATA |
| PUCE_149 | NO VOUCHER | -79,9422756  | 0,83411825   | Esmeraldas  | Tonchigue          | 10            | 30/12/1999 | <i>Leptogorgia sp1</i>       | NO DATA |
| PUCE_150 | NO VOUCHER | -79,808578   | 0,8960883    | Esmeraldas  | Tonsupa            | 5             | 20/11/2004 | <i>Muricea purpurea</i>      | NO DATA |
| PUCE_151 | NO VOUCHER | -80,7499996  | -1,35000028  | Manabi      | Puerto Cayo        | 31            | 04/12/2002 | <i>Leptogorgia pumila</i>    | NO DATA |
| PUCE_152 | NO VOUCHER | -80,512253   | -0,75458368  | Manabi      | San Clemente       | 24            | 01/08/1986 | <i>Leptogorgia sp2</i>       | NO DATA |
| PUCE_153 | NO VOUCHER | -80,5119581  | -0,75442485  | Manabi      | San Clemente       | 24            | 25/12/1985 | <i>Leptogorgia sp2</i>       | NO DATA |
| PUCE_154 | NO VOUCHER | -79,8524571  | 0,87333975   | Esmeraldas  | Atacames           | 7             | 30/10/2010 | <i>Leptogorgia pumila</i>    | NO DATA |
| PUCE_155 | NO VOUCHER | -80,7485816  | -1,34059295  | Manabi      | Puerto Cayo        | 31            | 27/12/2002 | <i>Leptogorgia pumila</i>    | NO DATA |
| PUCE_156 | NO VOUCHER | -80,7412698  | -1,34948395  | Manabi      | Puerto Cayo        | 31            | 04/01/2003 | <i>Leptogorgia alba</i>      | NO DATA |
| PUCE_157 | NO VOUCHER | -79,6527022  | 0,96919691   | Esmeraldas  | Rocafuerte         | 4             | 01/01/1982 | <i>Leptogorgia alba</i>      | NO DATA |
| PUCE_158 | NO VOUCHER | -79,5636107  | 0,99638921   | Esmeraldas  | Playa de Camarones | 3             | 02/11/2011 | <i>Leptogorgia cf alba</i>   | NO DATA |
| PUCE_159 | NO VOUCHER | -79,5638642  | 0,99546778   | Esmeraldas  | Playa de Camarones | 3             | 20/11/2010 | <i>Leptogorgia cf alba</i>   | NO DATA |
| PUCE_160 | NO VOUCHER | -79,6527022  | 0,96919691   | Esmeraldas  | Rocafuerte         | 4             | 14/01/1987 | <i>Leptogorgia cf alba</i>   | NO DATA |
| PUCE_161 | NO VOUCHER | -80,7499996  | -1,35000028  | Manabi      | Puerto Cayo        | 31            | 04/12/2002 | <i>Muricea purpurea</i>      | NO DATA |
| PUCE_162 | NO VOUCHER | -79,8771444  | 0,86852481   | Esmeraldas  | Sua                | 8             | 20/12/2000 | <i>Muricea purpurea</i>      | NO DATA |
| PUCE_163 | NO VOUCHER | -80,7560372  | -1,82695239  | Santa Elena | Monta?ita          | 37            | 30/12/2000 | <i>Muricea purpurea</i>      | NO DATA |
| PUCE_164 | NO VOUCHER | -80,0502238  | 0,82468281   | Esmeraldas  | Punta Galera       | 13            | 18/01/1987 | <i>Muricea purpurea</i>      | NO DATA |

| Sample   | Voucher    | Coordinate X | Coordinate Y | Province    | Locality        | Locality Code | Date       | Species                 | Depth   |
|----------|------------|--------------|--------------|-------------|-----------------|---------------|------------|-------------------------|---------|
| PUCE_165 | NO VOUCHER | -80,7499996  | -1,35000028  | Manabi      | Puerto Cayo     | 31            | 04/12/2002 | <i>Muricea purpurea</i> | NO DATA |
| PUCE_166 | NO VOUCHER | -80,0172058  | 0,8183831    | Esmeraldas  | Playa Escondida | 14            | 19/10/2012 | <i>Muricea purpurea</i> | NO DATA |
| PUCE_167 | NO VOUCHER | -79,8371233  | 0,87975934   | Esmeraldas  | Atacames        | 7             | 23/01/1988 | <i>Muricea purpurea</i> | NO DATA |
| PUCE_168 | NO VOUCHER | -80,7499996  | -1,35000028  | Manabi      | Puerto Cayo     | 31            | 25/12/2002 | <i>Muricea purpurea</i> | NO DATA |
| PUCE_169 | NO VOUCHER | -80,7499996  | -1,35000028  | Manabi      | Puerto Cayo     | 31            | 19/01/2003 | <i>Muricea purpurea</i> | NO DATA |
| PUCE_170 | NO VOUCHER | -80,8343294  | -1,6336335   | Manabi      | Puerto Rico     | 35            | 28/12/1993 | <i>Muricea purpurea</i> | NO DATA |
| PUCE_171 | NO VOUCHER | -80,8132926  | -1,55815632  | Manabi      | Puerto Lopez    | 34            | 18/01/2003 | <i>Muricea purpurea</i> | NO DATA |
| PUCE_172 | NO VOUCHER | -80,05024    | 0,82468281   | Esmeraldas  | Playa Galeras   | 12            | 20/10/2012 | <i>Muricea purpurea</i> | NO DATA |
| PUCE_173 | NO VOUCHER | -79,8785227  | 0,87197022   | Esmeraldas  | Sua             | 8             | 19/12/2002 | <i>Muricea purpurea</i> | NO DATA |
| PUCE_174 | NO VOUCHER | -80,7966667  | -1,71333352  | Santa Elena | La Rinconada    | 36            | 11/10/2013 | <i>Muricea purpurea</i> | NO DATA |
| PUCE_175 | NO VOUCHER | -80,7499996  | -1,35000028  | Manabi      | Puerto Cayo     | 31            | 19/01/2003 | <i>Muricea purpurea</i> | NO DATA |
| PUCE_176 | NO VOUCHER | -80,7666666  | -1,36666687  | Manabi      | Puerto Cayo     | 31            | 25/12/2002 | <i>Muricea purpurea</i> | NO DATA |
| PUCE_177 | NO VOUCHER | -80,7499996  | -1,35000028  | Manabi      | Puerto Cayo     | 31            | 28/12/2002 | <i>Muricea purpurea</i> | NO DATA |
| PUCE_178 | NO VOUCHER | -80,8137325  | -1,55890305  | Manabi      | Puerto Lopez    | 34            | 25/10/2001 | <i>Muricea purpurea</i> | NO DATA |
| PUCE_179 | NO VOUCHER | -79,873354   | 0,86783576   | Esmeraldas  | Sua             | 8             | 23/11/2000 | <i>Muricea purpurea</i> | NO DATA |
| PUCE_180 | NO VOUCHER | -80,8142656  | -1,56028754  | Manabi      | Puerto Lopez    | 34            | 05/12/2002 | <i>Muricea purpurea</i> | NO DATA |
| PUCE_181 | NO VOUCHER | -79,8381571  | 0,87941476   | Esmeraldas  | Atacames        | 7             | 23/01/1998 | <i>Muricea purpurea</i> | NO DATA |
| PUCE_182 | NO VOUCHER | -80,7562232  | -1,82806497  | Santa Elena | Monta?ita       | 37            | 27/12/2002 | <i>Muricea purpurea</i> | NO DATA |
| PUCE_183 | NO VOUCHER | -79,9252781  | 0,84750024   | Esmeraldas  | Same            | 9             | 18/01/1987 | <i>Muricea purpurea</i> | NO DATA |
| PUCE_184 | NO VOUCHER | -79,8127622  | 0,89451948   | Esmeraldas  | Tonsupa         | 5             | 18/01/1987 | <i>Muricea purpurea</i> | NO DATA |
| PUCE_185 | NO VOUCHER | -80,7499996  | -1,35000028  | Manabi      | Puerto Cayo     | 31            | 28/12/2002 | <i>Muricea purpurea</i> | NO DATA |
| PUCE_186 | NO VOUCHER | -80,8008971  | -1,49607514  | Manabi      | Los Frailes     | 33            | 27/12/2003 | <i>Muricea purpurea</i> | NO DATA |
| PUCE_187 | NO VOUCHER | -80,0519104  | 0,47411276   | Esmeraldas  | Portete         | 17            | 11/01/1984 | <i>Muricea purpurea</i> | NO DATA |
| PUCE_188 | NO VOUCHER | -80,7966667  | -1,71333352  | Santa Elena | La Rinconada    | 36            | 13/10/2013 | <i>Muricea purpurea</i> | NO DATA |

| Sample   | Voucher    | Coordinate X | Coordinate Y | Province    | Locality         | Locality Code | Date       | Species                  | Depth   |
|----------|------------|--------------|--------------|-------------|------------------|---------------|------------|--------------------------|---------|
| PUCE_189 | NO VOUCHER | -79,8393813  | 0,88031489   | Esmeraldas  | Sua              | 8             | 20/11/2000 | <i>Muricea purpurea</i>  | NO DATA |
| PUCE_190 | NO VOUCHER | -79,838003   | 0,88065945   | Esmeraldas  | Sua              | 8             | 20/11/2000 | <i>Muricea purpurea</i>  | NO DATA |
| PUCE_191 | NO VOUCHER | -80,7499996  | -1,35000028  | Manabi      | Puerto Cayo      | 31            | 28/12/2002 | <i>Muricea purpurea</i>  | NO DATA |
| PUCE_192 | NO VOUCHER | -80,0625126  | 0,06420637   | Manabi      | Pedernales       | 18            | 20/12/2002 | <i>Muricea purpurea</i>  | NO DATA |
| PUCE_193 | NO VOUCHER | -80,7499996  | -1,35000028  | Manabi      | Puerto Cayo      | 31            | 19/01/2003 | <i>Muricea sp1</i>       | NO DATA |
| PUCE_194 | NO VOUCHER | -80,5120261  | -0,75306347  | Manabi      | San Clemente     | 24            | 01/08/1986 | <i>Muricea sp1</i>       | NO DATA |
| PUCE_195 | NO VOUCHER | -80,7499996  | -1,35000028  | Manabi      | Puerto Cayo      | 31            | 25/12/2002 | <i>Muricea sp1</i>       | NO DATA |
| PUCE_196 | NO VOUCHER | -80,7666666  | -1,36666687  | Manabi      | Puerto Cayo      | 31            | 25/12/2002 | <i>Muricea sp1</i>       | NO DATA |
| PUCE_197 | NO VOUCHER | -80,7499996  | -1,35000028  | Manabi      | Puerto Cayo      | 31            | 19/01/2003 | <i>Muricea sp1</i>       | NO DATA |
| PUCE_198 | NO VOUCHER | -80,003398   | 0,81733731   | Esmeraldas  | Playa Escondida  | 14            | 13/10/2012 | <i>Muricea fruticosa</i> | NO DATA |
| PUCE_199 | NO VOUCHER | -80,9816045  | -2,19644479  | Santa Elena | Salinas          | 42            | 04/08/2002 | <i>Muricea fruticosa</i> | NO DATA |
| PUCE_200 | NO VOUCHER | -80,0624437  | 0,06113839   | Manabi      | Pedernales       | 18            | 29/12/2002 | <i>Muricea fruticosa</i> | NO DATA |
| PUCE_201 | NO VOUCHER | -80,7305001  | -0,93920028  | Manabi      | Playa Murcielago | 27            | 26/12/1993 | <i>Muricea fruticosa</i> | NO DATA |
| PUCE_202 | NO VOUCHER | -80,7666666  | -1,36666687  | Manabi      | Puerto Cayo      | 31            | 10/11/2012 | <i>Muricea fruticosa</i> | NO DATA |
| PUCE_203 | NO VOUCHER | -80,0010444  | 0,81707574   | Esmeraldas  | Playa Escondida  | 14            | 13/10/2012 | <i>Muricea fruticosa</i> | NO DATA |
| PUCE_204 | NO VOUCHER | -79,9482903  | 0,82941155   | Esmeraldas  | Tonchigue        | 10            | 30/10/2010 | <i>Muricea fruticosa</i> | NO DATA |
| PUCE_205 | NO VOUCHER | -80,7666666  | -1,36666687  | Manabi      | Puerto Cayo      | 31            | 27/12/1991 | <i>Muricea fruticosa</i> | NO DATA |
| PUCE_206 | NO VOUCHER | -80,7666666  | -1,36666687  | Manabi      | Puerto Cayo      | 31            | 10/11/2012 | <i>Muricea fruticosa</i> | NO DATA |
| PUCE_207 | NO VOUCHER | -80,0613415  | 0,06403692   | Manabi      | Pedernales       | 18            | 17/01/2003 | <i>Muricea fruticosa</i> | NO DATA |
| PUCE_208 | NO VOUCHER | -79,8732137  | 0,8651596    | Esmeraldas  | Sua              | 8             | 29/12/2002 | <i>Muricea fruticosa</i> | NO DATA |
| PUCE_209 | NO VOUCHER | -80,9671519  | -2,2029      | Santa Elena | Salinas          | 42            | 04/08/2002 | <i>Muricea fruticosa</i> | NO DATA |
| PUCE_210 | NO VOUCHER | -80,0007829  | 0,81707577   | Esmeraldas  | Playa Escondida  | 14            | 13/10/2012 | <i>Muricea fruticosa</i> | NO DATA |
| PUCE_211 | NO VOUCHER | -80,0610074  | 0,06516605   | Manabi      | Pedernales       | 18            | 30/12/2002 | <i>Muricea fruticosa</i> | NO DATA |
| PUCE_212 | NO VOUCHER | -80,0607234  | 0,0639042    | Manabi      | Pedernales       | 18            | 18/01/2003 | <i>Muricea fruticosa</i> | NO DATA |

| Sample   | Voucher    | Coordinate X | Coordinate Y | Province    | Locality     | Locality Code | Date       | Species                    | Depth   |
|----------|------------|--------------|--------------|-------------|--------------|---------------|------------|----------------------------|---------|
| PUCE_213 | NO VOUCHER | -79,8366247  | 0,88031493   | Esmeraldas  | Sua          | 8             | 06/12/2002 | <i>Muricea fruticosa</i>   | NO DATA |
| PUCE_214 | NO VOUCHER | -79,8781895  | 0,86796475   | Esmeraldas  | Sua          | 8             | 23/12/2002 | <i>Muricea fruticosa</i>   | NO DATA |
| PUCE_215 | NO VOUCHER | -79,9252781  | 0,84750024   | Esmeraldas  | Same         | 9             | 30/10/2010 | <i>Muricea fruticosa</i>   | NO DATA |
| PUCE_216 | NO VOUCHER | -80,7666666  | -1,36666687  | Manabi      | Puerto Cayo  | 31            | 28/12/1991 | <i>Muricea fruticosa</i>   | NO DATA |
| PUCE_217 | NO VOUCHER | -80,8360209  | -1,63163531  | Manabi      | Puerto Rico  | 35            | 10/10/2012 | <i>Muricea fruticosa</i>   | NO DATA |
| PUCE_218 | NO VOUCHER | -80,7666666  | -1,36666687  | Manabi      | Puerto Cayo  | 31            | 10/11/2012 | <i>Muricea fruticosa</i>   | NO DATA |
| PUCE_219 | NO VOUCHER | -80,7666666  | -1,36666687  | Manabi      | Puerto Cayo  | 31            | 10/11/2012 | <i>Muricea fruticosa</i>   | NO DATA |
| PUCE_220 | NO VOUCHER | -80,9600756  | -2,20228605  | Santa Elena | Salinas      | 42            | 26/12/1992 | <i>Muricea fruticosa</i>   | NO DATA |
| PUCE_221 | NO VOUCHER | -80,3904762  | -2,63935511  | Guayas      | Playas       | 44            | 30/12/2002 | <i>Muricea fruticosa</i>   | NO DATA |
| PUCE_222 | NO VOUCHER | -80,7666666  | -1,36666687  | Manabi      | Puerto Cayo  | 31            | 07/12/1991 | <i>Muricea fruticosa</i>   | NO DATA |
| PUCE_223 | NO VOUCHER | -80,7666666  | -1,36666687  | Manabi      | Puerto Cayo  | 31            | 10/11/2012 | <i>Muricea fruticosa</i>   | NO DATA |
| PUCE_224 | NO VOUCHER | -80,062649   | 0,06272933   | Manabi      | Pedernales   | 18            | 17/01/2003 | <i>Muricea fruticosa</i>   | NO DATA |
| PUCE_225 | NO VOUCHER | -80,0613147  | 0,06359855   | Manabi      | Pedernales   | 18            | 01/02/2003 | <i>Muricea fruticosa</i>   | NO DATA |
| PUCE_226 | NO VOUCHER | -80,7464032  | -1,34204482  | Manabi      | Puerto Cayo  | 31            | 27/12/2002 | <i>Muricea fruticosa</i>   | NO DATA |
| PUCE_227 | NO VOUCHER | -80,51248    | -0,75512823  | Manabi      | San Clemente | 24            | 01/05/1986 | <i>Muricea fruticosa</i>   | NO DATA |
| PUCE_228 | NO VOUCHER | -80,4524995  | -0,4797225   | Manabi      | Canoa        | 20            | 16/11/2012 | <i>Muricea fruticosa</i>   | NO DATA |
| PUCE_229 | NO VOUCHER | -80,5120261  | -0,75349458  | Manabi      | San Clemente | 24            | 01/08/1986 | <i>Muricea fruticosa</i>   | NO DATA |
| PUCE_230 | NO VOUCHER | -80,7966667  | -1,71333352  | Santa Elena | La Rinconada | 36            | 12/10/2013 | <i>Muricea fruticosa</i>   | NO DATA |
| PUCE_231 | NO VOUCHER | -80,0613415  | 0,06325235   | Manabi      | Pedernales   | 18            | 17/01/2003 | <i>Muricea fruticosa</i>   | NO DATA |
| PUCE_232 | NO VOUCHER | -80,7966667  | -1,71333352  | Santa Elena | La Rinconada | 36            | 12/10/2013 | <i>Muricea crassa</i>      | NO DATA |
| PUCE_233 | NO VOUCHER | -79,1666664  | 1,10000024   | Esmeraldas  | Pe?as        | 2             | 18/01/2003 | <i>Muricea squarrosa</i>   | NO DATA |
| PUCE_234 | NO VOUCHER | -80,7554649  | -1,82816818  | Santa Elena | Monta?ita    | 37            | 27/12/2002 | <i>Muricea plantaginea</i> | NO DATA |
| PUCE_235 | NO VOUCHER | -80,4024721  | -2,64181027  | Santa Elena | Playas       | 44            | 28/12/2002 | <i>Muricea plantaginea</i> | NO DATA |
| PUCE_236 | NO VOUCHER | -79,1666664  | 1,10000024   | Esmeraldas  | Pe?as        | 2             | 18/01/2003 | <i>Muricea squarrosa</i>   | NO DATA |

| Sample   | Voucher       | Coordinate X | Coordinate Y | Province    | Locality          | Locality Code | Date       | Species                       | Depth   |
|----------|---------------|--------------|--------------|-------------|-------------------|---------------|------------|-------------------------------|---------|
| PUCE_237 | NO VOUCHER    | -80,0615545  | 0,06468987   | Manabi      | Pedernales        | 18            | 30/12/2002 | <i>Muricea squarrosa</i>      | NO DATA |
| PUCE_238 | NO VOUCHER    | -80,0642884  | 0,0597693    | Manabi      | Pedernales        | 18            | 30/12/2002 | <i>Muricea crassa</i>         | NO DATA |
| PUCE_239 | NO VOUCHER    | -80,9623983  | -2,20289916  | Santa Elena | Salinas           | 42            | 05/08/2002 | <i>Leptogorgia taboguilla</i> | NO DATA |
| PUCE_240 | NO VOUCHER    | -79,8159003  | 0,8934736    | Esmeraldas  | Tonsupa           | 5             | 08/01/1982 | <i>Leptogorgia taboguilla</i> | NO DATA |
| PUCE_241 | NO VOUCHER    | -80,0502238  | 0,82468281   | Esmeraldas  | Punta Galera      | 13            | 22/10/2012 | <i>Leptogorgia cuspidata</i>  | NO DATA |
| PUCE_242 | NO VOUCHER    | -79,8750769  | 0,8668021    | Esmeraldas  | Sua               | 8             | 20/11/2000 | <i>Leptogorgia cuspidata</i>  | NO DATA |
| PUCE_243 | NO VOUCHER    | -80,7424999  | -1,34702419  | Manabi      | Puerto Cayo       | 31            | 04/01/2003 | <i>Leptogorgia cuspidata</i>  | NO DATA |
| PUCE_244 | NO VOUCHER    | -80,7446381  | -1,34435274  | Manabi      | Puerto Cayo       | 31            | 18/01/2003 | <i>Muricea hebes</i>          | NO DATA |
| PUCE_245 | NO VOUCHER    | -80,7439754  | -1,34578813  | Manabi      | Puerto Cayo       | 31            | 28/12/2002 | <i>Muricea hebes</i>          | NO DATA |
| PUCE_246 | NO VOUCHER    | -80,7967269  | -1,71466738  | Santa Elena | La Rinconada      | 36            | 12/10/2013 | <i>Muricea plantaginea</i>    | NO DATA |
| PUCE_247 | NO VOUCHER    | -80,8138873  | -1,55933434  | Manabi      | Puerto Lopez      | 34            | 28/10/2004 | <i>Muricea plantaginea</i>    | NO DATA |
| PUCE_248 | NO VOUCHER    | -80,4585572  | -0,46092271  | Manabi      | Canoa             | 20            | 19/01/2003 | <i>Muricea plantaginea</i>    | NO DATA |
| PUCE_249 | NO VOUCHER    | -80,7549923  | -1,82897876  | Santa Elena | Montañita         | 37            | 28/12/2002 | <i>Muricea plantaginea</i>    | NO DATA |
| PUCE_250 | NO VOUCHER    | -80,0634944  | 0,06042928   | Manabi      | Pedernales        | 18            | 30/12/2002 | <i>Muricea plantaginea</i>    | NO DATA |
| PUCE_251 | NO VOUCHER    | -80,7557102  | -1,82768169  | Santa Elena | Montañita         | 37            | 28/12/2002 | <i>Muricea plantaginea</i>    | NO DATA |
| PUCE_252 | NO VOUCHER    | -80,4187417  | -0,60051952  | Manabi      | Bahia de Caraquez | 21            | 01/12/1986 | <i>Muricea plantaginea</i>    | NO DATA |
| PUCE_253 | NO VOUCHER    | -80,7552132  | -1,98351654  | Santa Elena | Ayangue           | 40            | 27/12/3003 | <i>Muricea plantaginea</i>    | NO DATA |
| PUCE_254 | NO VOUCHER    | -80,4176372  | -0,60024342  | Manabi      | Bahia de Caraquez | 21            | 20/11/2010 | <i>Muricea plantaginea</i>    | NO DATA |
| PUCE_255 | NO VOUCHER    | -80,0646541  | 0,05849642   | Manabi      | Pedernales        | 18            | 13/11/2010 | <i>Muricea plantaginea</i>    | NO DATA |
| PUCE_256 | NO VOUCHER    | -81,0961026  | -1,27988341  | Manabi      | Isla de la Plata  | 30            | 27/12/2003 | <i>Muricea plantaginea</i>    | NO DATA |
| CENAIM_1 | 150807EP07-04 | -80,7890305  | -1,93505561  | Santa Elena | El Pelado         | 38            | 07/08/2015 | <i>Muricea squarrosa</i>      | 20 m    |
| CENAIM_2 | 150807EP07-06 | -80,7890443  | -1,93491732  | Santa Elena | El Pelado         | 38            | 07/08/2015 | <i>Muricea plantaginea</i>    | 20 m    |
| CENAIM_3 | 150813EP01-14 | -80,7890305  | -1,93518008  | Santa Elena | El Pelado         | 38            | 13/08/2015 | <i>Muricea fruticosa</i>      | 15 m    |
| CENAIM_4 | 150825EP03-07 | -80,7890858  | -1,93483434  | Santa Elena | El Pelado         | 38            | 25/08/2015 | <i>Muricea austera</i>        | 30 m    |

| Sample    | Voucher        | Coordinate X | Coordinate Y | Province    | Locality  | Locality Code | Date       | Species                       | Depth   |
|-----------|----------------|--------------|--------------|-------------|-----------|---------------|------------|-------------------------------|---------|
| CENAIM_5  | 150918EP04-27  | -80,7890443  | -1,93529071  | Santa Elena | El Pelado | 38            | 18/09/2015 | <i>Muricea purpurea</i>       | 10 m    |
| CENAIM_6  | 151204EP09-02  | -80,7890305  | -1,93484818  | Santa Elena | El Pelado | 38            | 04/12/2015 | <i>Leptogorgia taboguilla</i> | 13 m    |
| CENAIM_7  | 151204EP09-03  | -80,7889198  | -1,93494498  | Santa Elena | El Pelado | 38            | 04/12/2015 | <i>Leptogorgia alba</i>       | 10 m    |
| CENAIM_8  | 160212EP11-15  | -80,7896947  | -1,93479286  | Santa Elena | El Pelado | 38            | 12/02/2016 | <i>Muricea crassa</i>         | NO DATA |
| CENAIM_9  | 170907EP07-10  | -80,7897362  | -1,93501413  | Santa Elena | El Pelado | 38            | 07/09/2017 | <i>Leptogorgia cf alba</i>    | 7 m     |
| CENAIM_10 | 180718TSP02-03 | -80,7897223  | -1,93516625  | Santa Elena | El Pelado | 38            | 18/07/2018 | <i>Leptogorgia obscura</i>    | NO DATA |
| CENAIM_11 | 180802EP02-02  | -80,7897223  | -1,93537369  | Santa Elena | El Pelado | 38            | 02/08/2018 | <i>Leptogorgia pumila</i>     | NO DATA |
| CENAIM_12 | 180823PA01-03  | -80,7896947  | -1,93487584  | Santa Elena | Palmar    | 41            | 23/08/2018 | <i>Leptogorgia cuspidata</i>  | NO DATA |
| CENAIM_13 | 180718TSP02-04 | -80,7459969  | -1,96890933  | Santa Elena | San Pedro | 39            | 18/07/2018 | <i>Leptogorgia pumila</i>     | NO DATA |
| CENAIM_14 | 180725TSP01-02 | -80,7463152  | -1,96882636  | Santa Elena | San Pedro | 39            | 25/07/2018 | <i>Muricea purpurea</i>       | NO DATA |
| CENAIM_15 | 181017EP07-22  | -80,7889543  | -1,93508011  | Santa Elena | El Pelado | 38            | 17/10/2018 | <i>Muricea hebes</i>          | NO DATA |

### Supplementary Table S2

Localities and geographical coordinates of the five macrozones established at the Equatorial Front data from the Technical Secretariat of the Sea. Adapted from (Valle and Fuentes, 2014) [1].

| Macrozone | Locality                                             | Longitude | Latitude   |
|-----------|------------------------------------------------------|-----------|------------|
| M1        | Northern with Colombia                               | 1.439434  | -78.836946 |
|           | Punta Galera                                         | 0.820235  | -80.051967 |
| M2        | Territorial sea of Punta Galera                      | 0.820235  | -80.051967 |
|           | Northern of Cabo Pasado                              | 0.369021  | -80.484298 |
| M3        | Cabo Pasado                                          | 0.369021  | -80.484298 |
|           | Cabo San Lorenzo                                     | -1.058653 | -80.912380 |
| M4        | Perpendicular projection of Cabo San Lorenzo         | -1.058653 | -80.912380 |
|           | Puntilla Santa Elena                                 | -2.188625 | -81.010485 |
| M5        | Perpendicular projection of the Puntilla Santa Elena | -2.188625 | -81.010485 |
|           | Border limit with Perú                               | -3.382287 | -80.297060 |

**Supplementary Table S3**

Comparative features of the octocoral species found in the Macrozones at the Equatorial Front. The first line of each species corresponds to the morphological and taxonomical characteristics described in previous studies. The measurements are given in cm/mm.

| Species name                                             | Colour of colony                                           | Colour of the polyps     | Colony shape                           | Colony size length/wide (cm) | Branching pattern   | Length of unbranched terminal branchlets (cm) | Diameter of end branchlets (mm) | Dominant sclerite type      | Coenenchyme sclerites                             | Sclerites size length/wide (mm) |
|----------------------------------------------------------|------------------------------------------------------------|--------------------------|----------------------------------------|------------------------------|---------------------|-----------------------------------------------|---------------------------------|-----------------------------|---------------------------------------------------|---------------------------------|
| <i>Muricea fruticosa</i><br>(Breedy & Guzmán, 2016 [2])  | Reddish to dark brown/white to pale yellow stems bicolored | White                    | Bushy spherical                        | 25 x 40                      | Irregularly         | 15-40                                         | 3-6                             | Unilateral spinose spindles | Deep reddish brown/brownish yellow to pale yellow | 0.28-1.0 x 0.05-0.10            |
|                                                          | Reddish brown-white bicolored                              | White                    | Bushy                                  | 35 x 45                      | Irregularly         | 15-40                                         | 3-5                             | Unilateral spinose spindles | Reddish brown/amber/pale yellow to whitish        | 0.30-1.0 x 0.05-0.12            |
| <i>Muricea plantaginea</i><br>(Breedy & Guzmán, 2016[2]) | White-grey or light brown to yellowish                     | White or yellow          | Branch in a single plane/ flabelliform | 42 x 20                      | Irregularly lateral | 10-50                                         | 2-3                             | Leaf like-Spindles          | Reddish brown/orange to white                     | 0.25-1.0 x 0.08-0.21            |
|                                                          | Deep brown and white                                       | NA                       | Flabelliform                           | 40 x 18                      | Irregularly lateral | 10-50                                         | 2-3                             | Leaf like-Spindles          | Reddish brown and amber                           | 0.22-1.0 x 0.09-0.20            |
| <i>Muricea austera</i><br>(Breedy & Guzmán, 2016[2])     | Reddish brown/pale yellow                                  | Reddish orange to yellow | Bushy                                  | 17 x 20                      | Dichotomous-lateral | 50                                            | 6-9                             | Unilateral spinose spindles | Reddish brown/pale orange/yellow                  | 0.52-1.3 x 0.18-0.50            |
|                                                          | Reddish brown                                              | NA                       | Bushy                                  | 20 x 23                      | Dichotomous-lateral | 50                                            | 7-8                             | Unilateral spinose spindles | Reddish brown/orange/lig ht yellow                | 0.55-1.5 x 0.20-0.50            |

| Species name                                           | Colour of colony    | Colour of the polyps          | Colony shape              | Colony size length/wide (cm) | Branching pattern       | Length of unbranched terminal branchlets (cm) | Diameter of end branchlets (mm) | Dominant sclerite type       | Coenenchyme sclerites                                | Sclerites size length/wide (mm) |
|--------------------------------------------------------|---------------------|-------------------------------|---------------------------|------------------------------|-------------------------|-----------------------------------------------|---------------------------------|------------------------------|------------------------------------------------------|---------------------------------|
| <i>Muricea crassa</i><br>(Breedy & Guzmán, 2016[2])    | Deep brown          | White or yellow               | Bushy                     | 35 x 48                      | Dichotomous-lateral     | 70                                            | 7-10                            | Unilateral spinose spindles  | Reddish brown/lighter and darker hues                | 0.52-2.0 x 0.40-0.68            |
|                                                        | Dark brown          | NA                            | Bushy                     | 40 x 50                      | Dichotomous-lateral     | 70                                            | 7-10                            | Large and irregular spindles | Reddish brown                                        | 0.56-2.5 x 0.40-0.70            |
| <i>Muricea purpurea</i><br>(Breedy & Guzmán, 2016[2])  | Blue and purple     | Reddish orange                | Bushy                     | 16 x 22                      | Dichotomous             | 50                                            | 12-14                           | Leaf like-Spindles           | Dark red/reddish orange                              | 0.3-0.60 x 0.09-0.28            |
|                                                        | Reddish purple      | Reddish orange                | Bushy                     | 22 x 21                      | Dichotomous             | 50-80                                         | 9-11                            | Leaf like-Spindles           | Dark red/reddish orange                              | 0.3-0.70 x 0.10-0.30            |
| <i>Muricea squarrosa</i><br>(Breedy & Guzmán, 2015[3]) | Light to deep brown | Dull yellow to light brownish | Bushy/flabellate          | 19 x 13                      | Dichotomous             | 40                                            | 12-18                           | Spindles                     | Pale yellow to light brownish                        | 1.2 x 0.20                      |
|                                                        | Light brown /brown  | NA                            | Flabellate                | 14 x 12                      | Dichotomous             | 40                                            | 12-20                           | Spindles                     | Dull yellow to light brownish/whitish and colourless | 1.3 x 0.23                      |
| <i>Muricea hebes</i><br>(Breedy & Guzmán, 2016[2])     | Yellowish brown     | White                         | Finger like / multiplanar | 18 x 20                      | Irregularly dichotomous | 2 - 6                                         | 8 - 10                          | Unilateral spinose spindles  | Pale yellow to yellowish                             | 0.45 – 0.83 x 0.1 – 0.45        |
|                                                        | Yellowish brown     | White                         | Finger like / multiplanar | -                            | Irregularly dichotomous | 32                                            | 6 - 9                           | Unilateral spinose spindles  | Pale yellow to yellowish                             | 0.45 – 0.83 x 0.1 – 0.45        |
| <i>Leptogorgia alba</i><br>(Breedy & Guzmán, 2007[4])  | White/pale pink     | White/ colourless             | Flabellate                | 17 x 11                      | Irregular/pinnate       | 3 or less                                     | 1-2                             | Spindles                     | Colourless                                           | 0.03 x 0.14                     |
|                                                        | White               | White/ colourless             | Flabellate                | 9.5 x 11                     | Dichotomous/irregular   | 3 or less                                     | 1.0-1.5                         | Spindles                     | Colourless and few pink                              | 0.04-0.06 x 0.18                |

| Species name                                                | Colour of colony         | Colour of the polyps  | Colony shape      | Colony size length/wide (cm) | Branching pattern   | Length of unbranched terminal branchlets (cm) | Diameter of end branchlets (mm) | Dominant sclerite type | Coenenchyme sclerites                                        | Sclerites size length/wide (mm) |
|-------------------------------------------------------------|--------------------------|-----------------------|-------------------|------------------------------|---------------------|-----------------------------------------------|---------------------------------|------------------------|--------------------------------------------------------------|---------------------------------|
| <i>Leptogorgia obscura</i> (Breedy & Guzmán, 2007[4])       | Purple                   | Purple to red         | Irregular/pinnate | 10 x 15                      | Dichotomous         | 50                                            | 1-3                             | Spindles/ capstans     | Violet/pink                                                  | 0.06-0.12 x 0.02-0.05           |
|                                                             | Dark violet              | Violet to pink        | Irregular/pinnate | 4 x 4                        | Dichotomous         | 52-54                                         | 1.5-2                           | Capstans               | Violet/pink                                                  | 0.08-0.12 x 0.05                |
| <i>Leptogorgia cf alba</i>                                  | Pink                     | White                 | Flabelate         | 23 x 7                       | Irregular / pinnate | 1.3 – 3.5                                     | 1 - 2                           | Spindles               | White / pink                                                 | 0.03 x 0.14                     |
|                                                             | Dark pink                | White                 | Flabelate         | 20 x 10                      | Irregular /pinnate  | -                                             | -                               | Spindles               | Pink                                                         | -                               |
| <i>Leptogorgia aequatorialis</i> (Breedy & Guzmán, 2007[4]) | Deep orange              | Whitish               | Alternate pinnae  | 7 x 7                        | Irregular/pinnate   | 1.5                                           | 2.5 - 3                         | Blunt spindles         | Orange                                                       | 0.08 – 0.10 x 0.45              |
|                                                             | Deep orange              | Whitish               | Alternate pinnae  | 7 x 7                        | Irregular/pinnate   | 1.5                                           | 2.5 - 3                         | Blunt spindles         | Orange                                                       | 0.08 – 0.10 x 0.45              |
| <i>Leptogorgia cuspidata</i> (Breedy & Guzmán, 2007[4])     | Deep orange to yellowish | Pale orange to yellow | Thick and stiff   | 12 x 16                      | Several fans        | Absents o very small                          | Short 2-3                       | Blunt spindles         | Orange to yellow/ colourless or bicoloured                   | 0.06-0.012 x 0.02-0.04          |
|                                                             | Brownish orange          | NA                    | Fan               | 4 x 16                       | Several fans        | Na                                            | Short 0.8-1                     | Blunt spindles         | Pink, orange, and lemon yellow bicoloured and multi-coloured | 0.1 x 0.04                      |

**Supplementary Table S4**

Checklist of 271 specimens of octocorals corresponding to the environmental data of *Muricea* and *Leptogorgia* in the Equatorial Front. The data are obtained from the Ocean Biology Processing Group (OBPG) of the NASA. Each data corresponds to PUCE and CENAIM samples in the geographical location of each sample.

| Sample  | Locality Code | Genus              | Specie      | SST WET [°C] | SST DRY [°C] | CHL WET [mg/m <sup>3</sup> ] | CHL DRY [mg/m <sup>3</sup> ] | PIC WET [mol/m <sup>3</sup> ] | PIC DRY [mol/m <sup>3</sup> ] | POC WET [mg/m <sup>3</sup> ] | POC DRY [mg/m <sup>3</sup> ] | PAR WET [e/m <sup>2</sup> x day] | PAR DRY [e/m <sup>2</sup> x day] |
|---------|---------------|--------------------|-------------|--------------|--------------|------------------------------|------------------------------|-------------------------------|-------------------------------|------------------------------|------------------------------|----------------------------------|----------------------------------|
| PUCE_1  | 43            | <i>Leptogorgia</i> | <i>alba</i> | 26.128       | 23.918       | 1.524                        | 1.341                        | NO DATA                       | NO DATA                       | NO DATA                      | NO DATA                      | 47.808                           | 35.365                           |
| PUCE_2  | 18            | <i>Leptogorgia</i> | <i>alba</i> | NO DATA      | NO DATA      | NO DATA                      | NO DATA                      | 0.009                         | 0.005                         | 294.052                      | 246.279                      | 40.892                           | 34.968                           |
| PUCE_3  | 3             | <i>Leptogorgia</i> | <i>alba</i> | NO DATA      | NO DATA      | NO DATA                      | NO DATA                      | NO DATA                       | NO DATA                       | NO DATA                      | NO DATA                      | 38.771                           | 40.473                           |
| PUCE_4  | 3             | <i>Leptogorgia</i> | <i>alba</i> | NO DATA      | NO DATA      | NO DATA                      | NO DATA                      | NO DATA                       | NO DATA                       | NO DATA                      | NO DATA                      | 38.771                           | 40.473                           |
| PUCE_5  | 7             | <i>Leptogorgia</i> | <i>alba</i> | 27.457       | 26.689       | 2.156                        | 1.115                        | 0.003                         | 0.003                         | 289.054                      | 212.437                      | 38.482                           | 35.679                           |
| PUCE_6  | 4             | <i>Leptogorgia</i> | <i>alba</i> | NO DATA      | NO DATA      | NO DATA                      | NO DATA                      | NO DATA                       | NO DATA                       | NO DATA                      | NO DATA                      | 38.666                           | 37.335                           |
| PUCE_7  | 18            | <i>Leptogorgia</i> | <i>alba</i> | NO DATA      | NO DATA      | NO DATA                      | NO DATA                      | 0.009                         | 0.005                         | 294.052                      | 246.279                      | 40.892                           | 34.968                           |
| PUCE_8  | 2             | <i>Leptogorgia</i> | <i>alba</i> | 28.186       | 27.550       | 3.239                        | 1.454                        | 0.005                         | 0.006                         | 471.453                      | 313.914                      | 42.467                           | 41.431                           |
| PUCE_9  | 8             | <i>Leptogorgia</i> | <i>alba</i> | 27.457       | 26.689       | 2.156                        | 1.115                        | NO DATA                       | NO DATA                       | NO DATA                      | NO DATA                      | 37.590                           | 35.601                           |
| PUCE_10 | 15            | <i>Leptogorgia</i> | <i>alba</i> | 27.319       | 25.844       | NO DATA                      | NO DATA                      | 0.000                         | NO DATA                       | 159.457                      | NO DATA                      | 39.153                           | 30.673                           |
| PUCE_11 | 17            | <i>Leptogorgia</i> | <i>alba</i> | NO DATA      | NO DATA      | NO DATA                      | NO DATA                      | 0.001                         | 0.001                         | 203.831                      | 135.649                      | 40.052                           | 32.100                           |
| PUCE_12 | 8             | <i>Leptogorgia</i> | <i>alba</i> | 27.457       | 26.689       | 2.156                        | 1.115                        | NO DATA                       | NO DATA                       | NO DATA                      | NO DATA                      | 37.590                           | 35.601                           |
| PUCE_13 | 9             | <i>Leptogorgia</i> | <i>alba</i> | 27.481       | 26.560       | 1.632                        | 0.754                        | NO DATA                       | NO DATA                       | NO DATA                      | NO DATA                      | 37.436                           | 33.218                           |
| PUCE_14 | 24            | <i>Leptogorgia</i> | <i>alba</i> | NO DATA      | NO DATA      | NO DATA                      | NO DATA                      | 0.000                         | 0.001                         | 161.364                      | 126.943                      | 43.663                           | 41.219                           |
| PUCE_15 | 7             | <i>Leptogorgia</i> | <i>alba</i> | 27.457       | 26.689       | 2.156                        | 1.115                        | 0.003                         | 0.003                         | 289.054                      | 212.437                      | 38.482                           | 35.679                           |
| PUCE_16 | 14            | <i>Leptogorgia</i> | <i>alba</i> | 27.514       | 26.399       | NO DATA                      | NO DATA                      | NO DATA                       | NO DATA                       | NO DATA                      | NO DATA                      | 38.565                           | 32.403                           |
| PUCE_17 | 9             | <i>Leptogorgia</i> | <i>alba</i> | 27.481       | 26.560       | 1.632                        | 0.754                        | NO DATA                       | NO DATA                       | NO DATA                      | NO DATA                      | 37.436                           | 33.218                           |
| PUCE_18 | 2             | <i>Leptogorgia</i> | <i>alba</i> | 28.186       | 27.550       | 3.239                        | 1.454                        | 0.005                         | 0.006                         | 471.453                      | 313.914                      | 42.467                           | 41.431                           |
| PUCE_19 | 31            | <i>Leptogorgia</i> | <i>alba</i> | 26.265       | 24.152       | 1.123                        | 0.810                        | NO DATA                       | NO DATA                       | NO DATA                      | NO DATA                      | 42.690                           | 30.430                           |
| PUCE_20 | 9             | <i>Leptogorgia</i> | <i>alba</i> | 27.481       | 26.560       | 1.632                        | 0.754                        | NO DATA                       | NO DATA                       | NO DATA                      | NO DATA                      | 37.436                           | 33.218                           |

[illegible]

| Sample  | Locality Code | Genus              | Specie      | SST WET<br>[°C] | SST DRY<br>[°C] | CHL WET<br>[mg/m³] | CHL DRY<br>[mg/m³] | PIC WET<br>[mol/m³] | PIC DRY<br>[mol/m³] | POC WET<br>[mg/m³] | POC DRY [mg/m³] | PAR WET<br>[e/m²x day] | PAR DRY<br>[e/m²x day] |
|---------|---------------|--------------------|-------------|-----------------|-----------------|--------------------|--------------------|---------------------|---------------------|--------------------|-----------------|------------------------|------------------------|
| PUCE_46 | 43            | <i>Leptogorgia</i> | <i>alba</i> | 26.128          | 23.918          | 1.524              | 1.341              | NO DATA             | NO DATA             | NO DATA            | NO DATA         | 47.808                 | 35.365                 |
| PUCE_47 | 31            | <i>Leptogorgia</i> | <i>alba</i> | 26.265          | 24.152          | 1.123              | 0.810              | NO DATA             | NO DATA             | NO DATA            | NO DATA         | 42.690                 | 30.430                 |
| PUCE_48 | 27            | <i>Leptogorgia</i> | <i>alba</i> | 26.390          | 24.920          | 1.573              | 0.629              | 0.001               | 0.001               | 199.325            | 139.540         | 44.249                 | 42.604                 |
| PUCE_49 | 5             | <i>Leptogorgia</i> | <i>alba</i> | NO DATA         | NO DATA         | NO DATA            | NO DATA            | 0.003               | 0.004               | 297.390            | NO DATA         | 38.211                 | 35.679                 |
| PUCE_50 | 9             | <i>Leptogorgia</i> | <i>alba</i> | 27.481          | 26.560          | 1.632              | 0.754              | NO DATA             | NO DATA             | NO DATA            | NO DATA         | 37.436                 | 33.218                 |
| PUCE_51 | 26            | <i>Leptogorgia</i> | <i>alba</i> | 26.390          | 24.920          | 1.573              | 0.629              | 0.001               | 0.001               | 199.325            | 139.540         | 44.249                 | 42.604                 |
| PUCE_52 | 20            | <i>Leptogorgia</i> | <i>alba</i> | NO DATA         | NO DATA         | NO DATA            | NO DATA            | 0.003               | 0.006               | 272.834            | 259.536         | 42.195                 | 34.730                 |
| PUCE_53 | 30            | <i>Leptogorgia</i> | <i>alba</i> | 25.918          | 24.222          | 0.897              | 0.539              | 0.000               | 0.000               | 136.434            | 112.452         | 47.274                 | 34.375                 |
| PUCE_54 | 6             | <i>Leptogorgia</i> | <i>alba</i> | NO DATA         | NO DATA         | NO DATA            | NO DATA            | 0.003               | 0.004               | 297.390            | NO DATA         | 38.211                 | 35.679                 |
| PUCE_55 | 21            | <i>Leptogorgia</i> | <i>alba</i> | 27.228          | 25.415          | NO DATA            | NO DATA            | NO DATA             | NO DATA             | NO DATA            | NO DATA         | 40.507                 | 36.872                 |
| PUCE_56 | 11            | <i>Leptogorgia</i> | <i>alba</i> | 28.874          | NO DATA         | NO DATA            | NO DATA            | NO DATA             | NO DATA             | NO DATA            | NO DATA         | 38.079                 | 33.218                 |
| PUCE_57 | 16            | <i>Leptogorgia</i> | <i>alba</i> | 27.458          | 26.081          | NO DATA            | NO DATA            | 0.001               | 0.001               | 213.819            | 130.192         | 39.035                 | 29.003                 |
| PUCE_58 | 34            | <i>Leptogorgia</i> | <i>alba</i> | NO DATA         | NO DATA         | NO DATA            | NO DATA            | NO DATA             | NO DATA             | NO DATA            | NO DATA         | 44.057                 | 27.799                 |
| PUCE_59 | 5             | <i>Leptogorgia</i> | <i>alba</i> | NO DATA         | NO DATA         | NO DATA            | NO DATA            | 0.003               | 0.004               | 297.390            | NO DATA         | 38.211                 | 35.679                 |
| PUCE_60 | 5             | <i>Leptogorgia</i> | <i>alba</i> | NO DATA         | NO DATA         | NO DATA            | NO DATA            | 0.003               | 0.004               | 297.390            | NO DATA         | 38.211                 | 35.679                 |
| PUCE_61 | 11            | <i>Leptogorgia</i> | <i>alba</i> | 28.874          | NO DATA         | NO DATA            | NO DATA            | NO DATA             | NO DATA             | NO DATA            | NO DATA         | 38.079                 | 33.218                 |
| PUCE_62 | 5             | <i>Leptogorgia</i> | <i>alba</i> | NO DATA         | NO DATA         | NO DATA            | NO DATA            | 0.003               | 0.004               | 297.390            | NO DATA         | 38.211                 | 35.679                 |
| PUCE_63 | 34            | <i>Leptogorgia</i> | <i>alba</i> | NO DATA         | NO DATA         | NO DATA            | NO DATA            | NO DATA             | NO DATA             | NO DATA            | NO DATA         | 44.057                 | 27.799                 |
| PUCE_64 | 5             | <i>Leptogorgia</i> | <i>alba</i> | NO DATA         | NO DATA         | NO DATA            | NO DATA            | 0.003               | 0.004               | 297.390            | NO DATA         | 38.211                 | 35.679                 |
| PUCE_65 | 30            | <i>Leptogorgia</i> | <i>alba</i> | 25.918          | 24.222          | 0.897              | 0.539              | 0.000               | 0.000               | 136.434            | 112.452         | 47.274                 | 34.375                 |
| PUCE_66 | 34            | <i>Leptogorgia</i> | <i>alba</i> | NO DATA         | NO DATA         | NO DATA            | NO DATA            | NO DATA             | NO DATA             | NO DATA            | NO DATA         | 44.057                 | 27.799                 |
| PUCE_67 | 34            | <i>Leptogorgia</i> | <i>alba</i> | NO DATA         | NO DATA         | NO DATA            | NO DATA            | NO DATA             | NO DATA             | NO DATA            | NO DATA         | 44.057                 | 27.799                 |
| PUCE_68 | 31            | <i>Leptogorgia</i> | <i>alba</i> | 26.265          | 24.152          | 1.123              | 0.810              | 0.000               | NO DATA             | 177.517            | NO DATA         | 43.406                 | 31.885                 |
| PUCE_69 | 5             | <i>Leptogorgia</i> | <i>alba</i> | NO DATA         | NO DATA         | NO DATA            | NO DATA            | 0.003               | 0.004               | 297.390            | NO DATA         | 38.211                 | 35.679                 |
| PUCE_70 | 5             | <i>Leptogorgia</i> | <i>alba</i> | NO DATA         | NO DATA         | NO DATA            | NO DATA            | 0.003               | 0.004               | 294.821            | NO DATA         | 39.412                 | 35.679                 |

| Sample  | Locality Code | Genus              | Specie            | SST WET<br>[°C] | SST DRY<br>[°C] | CHL WET<br>[mg/m³] | CHL DRY<br>[mg/m³] | PIC WET<br>[mol/m³] | PIC DRY<br>[mol/m³] | POC WET<br>[mg/m³] | POC DRY [mg/m³] | PAR WET<br>[e/m²x day] | PAR DRY<br>[e/m²x day] |
|---------|---------------|--------------------|-------------------|-----------------|-----------------|--------------------|--------------------|---------------------|---------------------|--------------------|-----------------|------------------------|------------------------|
| PUCE_71 | 31            | <i>Leptogorgia</i> | <i>alba</i>       | 26.265          | 24.152          | 1.123              | 0.810              | 0.000               | NO DATA             | 177.517            | NO DATA         | 43.406                 | 31.885                 |
| PUCE_72 | 34            | <i>Leptogorgia</i> | <i>alba</i>       | NO DATA         | NO DATA         | NO DATA            | NO DATA            | NO DATA             | NO DATA             | NO DATA            | NO DATA         | 44.057                 | 27.799                 |
| PUCE_73 | 7             | <i>Leptogorgia</i> | <i>alba</i>       | 27.457          | 26.689          | 2.156              | 1.115              | 0.003               | 0.003               | 289.054            | 212.437         | 38.482                 | 35.601                 |
| PUCE_74 | 31            | <i>Leptogorgia</i> | <i>alba</i>       | 26.265          | 24.152          | 1.123              | 0.810              | 0.000               | NO DATA             | 177.517            | NO DATA         | 43.406                 | 31.885                 |
| PUCE_75 | 5             | <i>Leptogorgia</i> | <i>alba</i>       | NO DATA         | NO DATA         | NO DATA            | NO DATA            | 0.003               | 0.004               | 297.390            | NO DATA         | 38.211                 | 35.679                 |
| PUCE_76 | 34            | <i>Leptogorgia</i> | <i>cuspidata</i>  | NO DATA         | NO DATA         | NO DATA            | NO DATA            | NO DATA             | NO DATA             | NO DATA            | NO DATA         | 44.057                 | 27.799                 |
| PUCE_77 | 16            | <i>Leptogorgia</i> | <i>cuspidata</i>  | 27.458          | 26.081          | NO DATA            | NO DATA            | 0.001               | 0.001               | 213.819            | 130.192         | 39.035                 | 29.003                 |
| PUCE_78 | 37            | <i>Leptogorgia</i> | <i>cuspidata</i>  | 26.774          | 23.466          | NO DATA            | NO DATA            | NO DATA             | NO DATA             | NO DATA            | NO DATA         | 44.515                 | 29.581                 |
| PUCE_79 | 31            | <i>Leptogorgia</i> | <i>cuspidata</i>  | 26.265          | 24.152          | 1.123              | 0.810              | NO DATA             | NO DATA             | NO DATA            | NO DATA         | 42.690                 | 30.430                 |
| PUCE_80 | 29            | <i>Leptogorgia</i> | <i>cuspidata</i>  | 26.198          | 24.748          | 1.439              | 0.546              | NO DATA             | NO DATA             | NO DATA            | NO DATA         | 45.460                 | 42.286                 |
| PUCE_81 | 12            | <i>Leptogorgia</i> | <i>cuspidata</i>  | 27.514          | 26.399          | NO DATA            | NO DATA            | 0.001               | NO DATA             | 185.327            | NO DATA         | 39.739                 | 35.046                 |
| PUCE_82 | 31            | <i>Leptogorgia</i> | <i>cuspidata</i>  | 26.265          | 24.152          | 1.123              | 0.810              | 0.000               | NO DATA             | 177.517            | NO DATA         | 43.406                 | 31.885                 |
| PUCE_83 | 21            | <i>Leptogorgia</i> | <i>taboguilla</i> | 27.228          | 25.415          | NO DATA            | NO DATA            | NO DATA             | NO DATA             | NO DATA            | NO DATA         | 40.507                 | 36.872                 |
| PUCE_84 | 5             | <i>Leptogorgia</i> | <i>taboguilla</i> | NO DATA         | NO DATA         | NO DATA            | NO DATA            | 0.003               | 0.004               | 297.390            | NO DATA         | 38.211                 | 35.679                 |
| PUCE_85 | 21            | <i>Leptogorgia</i> | <i>taboguilla</i> | 27.228          | 25.415          | NO DATA            | NO DATA            | NO DATA             | NO DATA             | NO DATA            | NO DATA         | 40.507                 | 36.872                 |
| PUCE_86 | 7             | <i>Leptogorgia</i> | <i>taboguilla</i> | 27.457          | 26.689          | 2.156              | 1.115              | 0.003               | 0.003               | 289.054            | 212.437         | 38.482                 | 35.679                 |
| PUCE_87 | 7             | <i>Leptogorgia</i> | <i>taboguilla</i> | 27.457          | 26.689          | 2.156              | 1.115              | 0.003               | 0.003               | 289.054            | 212.437         | 38.482                 | 35.679                 |
| PUCE_88 | 8             | <i>Leptogorgia</i> | <i>taboguilla</i> | 27.457          | 26.689          | 2.156              | 1.115              | NO DATA             | NO DATA             | NO DATA            | NO DATA         | 37.590                 | 35.601                 |
| PUCE_89 | 24            | <i>Leptogorgia</i> | <i>obscura</i>    | NO DATA         | NO DATA         | NO DATA            | NO DATA            | 0.000               | 0.001               | 161.364            | 126.943         | 43.663                 | 41.219                 |
| PUCE_90 | 7             | <i>Leptogorgia</i> | <i>obscura</i>    | 27.457          | 26.689          | 2.156              | 1.115              | 0.003               | 0.003               | 289.054            | 212.437         | 38.482                 | 35.679                 |
| PUCE_91 | 24            | <i>Leptogorgia</i> | <i>obscura</i>    | NO DATA         | NO DATA         | NO DATA            | NO DATA            | 0.000               | 0.001               | 161.364            | 126.943         | 43.663                 | 41.219                 |
| PUCE_92 | 44            | <i>Leptogorgia</i> | <i>obscura</i>    | NO DATA         | NO DATA         | NO DATA            | NO DATA            | NO DATA             | NO DATA             | NO DATA            | NO DATA         | 45.723                 | 41.132                 |
| PUCE_93 | 7             | <i>Leptogorgia</i> | <i>obscura</i>    | 27.457          | 26.689          | 2.156              | 1.115              | 0.003               | 0.003               | 289.054            | 212.437         | 38.482                 | 35.601                 |
| PUCE_94 | 42            | <i>Leptogorgia</i> | <i>obscura</i>    | 25.958          | 23.735          | 1.476              | 1.155              | 0.001               | 0.001               | 215.450            | 198.700         | 48.231                 | 36.093                 |
| PUCE_95 | 20            | <i>Leptogorgia</i> | <i>obscura</i>    | NO DATA         | NO DATA         | NO DATA            | NO DATA            | 0.003               | 0.006               | 273.051            | 259.627         | 41.957                 | 32.917                 |

| Sample   | Locality<br>Code | Genus              | Specie         | SST WET<br>[°C] | SST<br>DRY<br>[°C] | CHL<br>WET<br>[mg/m³] | CHL<br>DRY<br>[mg/m³] | PIC<br>WET<br>[mol/m³] | PIC<br>DRY<br>[mol/m³] | POC<br>WET<br>[mg/m³] | POC<br>DRY [mg/m³] | PAR<br>WET<br>[e/m²x day] | PAR<br>DRY<br>[e/m²x day] |
|----------|------------------|--------------------|----------------|-----------------|--------------------|-----------------------|-----------------------|------------------------|------------------------|-----------------------|--------------------|---------------------------|---------------------------|
| PUCE_96  | 7                | <i>Leptogorgia</i> | <i>obscura</i> | 27.457          | 26.689             | 2.156                 | 1.115                 | 0.003                  | 0.003                  | 289.054               | 212.437            | 38.482                    | 35.679                    |
| PUCE_97  | 31               | <i>Leptogorgia</i> | <i>obscura</i> | NO DATA         | NO DATA            | NO DATA               | NO DATA               | NO DATA                | NO DATA                | NO DATA               | NO DATA            | 42.690                    | 30.430                    |
| PUCE_98  | 24               | <i>Leptogorgia</i> | <i>obscura</i> | NO DATA         | NO DATA            | NO DATA               | NO DATA               | 0.000                  | 0.001                  | 161.364               | 126.943            | 43.663                    | 41.219                    |
| PUCE_99  | 35               | <i>Leptogorgia</i> | <i>obscura</i> | 26.306          | 23.819             | NO DATA               | NO DATA               | 0.000                  | 0.000                  | 147.151               | 133.714            | 44.623                    | 25.571                    |
| PUCE_100 | 31               | <i>Leptogorgia</i> | <i>obscura</i> | 26.265          | 24.152             | 1.123                 | 0.810                 | NO DATA                | NO DATA                | NO DATA               | NO DATA            | 42.690                    | 30.430                    |
| PUCE_101 | 19               | <i>Leptogorgia</i> | <i>obscura</i> | 28.468          | NO DATA            | NO DATA               | NO DATA               | 0.007                  | NO DATA                | NO DATA               | NO DATA            | 41.670                    | 36.427                    |
| PUCE_102 | 24               | <i>Leptogorgia</i> | <i>obscura</i> | NO DATA         | NO DATA            | NO DATA               | NO DATA               | 0.000                  | 0.001                  | 161.364               | 126.943            | 43.663                    | 41.219                    |
| PUCE_103 | 24               | <i>Leptogorgia</i> | <i>obscura</i> | NO DATA         | NO DATA            | NO DATA               | NO DATA               | 0.000                  | 0.001                  | 161.364               | 126.943            | 43.663                    | 41.219                    |
| PUCE_104 | 27               | <i>Leptogorgia</i> | <i>obscura</i> | 26.390          | 24.920             | 1.573                 | 0.629                 | 0.001                  | 0.001                  | 199.325               | 139.540            | 44.249                    | 42.604                    |
| PUCE_105 | 27               | <i>Leptogorgia</i> | <i>obscura</i> | 26.390          | 24.920             | 1.573                 | 0.629                 | 0.001                  | 0.001                  | 199.325               | 139.540            | 44.249                    | 42.604                    |
| PUCE_106 | 20               | <i>Leptogorgia</i> | <i>obscura</i> | NO DATA         | NO DATA            | NO DATA               | NO DATA               | 0.003                  | 0.006                  | 273.051               | 259.627            | 41.957                    | 33.085                    |
| PUCE_107 | 23               | <i>Leptogorgia</i> | <i>obscura</i> | 27.228          | 25.415             | NO DATA               | NO DATA               | NO DATA                | NO DATA                | NO DATA               | NO DATA            | 41.482                    | 37.160                    |
| PUCE_108 | 6                | <i>Leptogorgia</i> | <i>obscura</i> | NO DATA         | NO DATA            | NO DATA               | NO DATA               | 0.003                  | 0.004                  | 297.390               | NO DATA            | 38.211                    | 35.679                    |
| PUCE_109 | 44               | <i>Leptogorgia</i> | <i>obscura</i> | NO DATA         | NO DATA            | NO DATA               | NO DATA               | NO DATA                | NO DATA                | NO DATA               | NO DATA            | 45.894                    | 41.132                    |
| PUCE_110 | 31               | <i>Leptogorgia</i> | <i>obscura</i> | NO DATA         | NO DATA            | NO DATA               | NO DATA               | NO DATA                | NO DATA                | NO DATA               | NO DATA            | 42.690                    | 30.430                    |
| PUCE_111 | 27               | <i>Leptogorgia</i> | <i>obscura</i> | 26.390          | 24.920             | 1.573                 | 0.629                 | 0.001                  | 0.001                  | 199.325               | 139.540            | 44.249                    | 42.604                    |
| PUCE_112 | 25               | <i>Leptogorgia</i> | <i>obscura</i> | NO DATA         | NO DATA            | NO DATA               | NO DATA               | 0.001                  | 0.001                  | 173.787               | 132.555            | 43.395                    | 42.744                    |
| PUCE_113 | 5                | <i>Leptogorgia</i> | <i>obscura</i> | NO DATA         | NO DATA            | NO DATA               | NO DATA               | 0.003                  | 0.004                  | 300.268               | NO DATA            | 39.270                    | 35.679                    |
| PUCE_114 | 7                | <i>Leptogorgia</i> | <i>obscura</i> | 27.457          | 26.689             | 2.156                 | 1.115                 | 0.003                  | 0.003                  | 289.054               | 212.437            | 38.482                    | 35.679                    |
| PUCE_115 | 25               | <i>Leptogorgia</i> | <i>obscura</i> | NO DATA         | NO DATA            | NO DATA               | NO DATA               | 0.001                  | 0.001                  | 173.787               | 132.555            | 43.395                    | 42.744                    |
| PUCE_116 | 22               | <i>Leptogorgia</i> | <i>obscura</i> | 27.228          | 25.415             | NO DATA               | NO DATA               | 0.003                  | 0.003                  | 254.848               | NO DATA            | 41.609                    | 37.160                    |
| PUCE_117 | 28               | <i>Leptogorgia</i> | <i>obscura</i> | 26.198          | 24.748             | 1.439                 | 0.546                 | 0.001                  | 0.001                  | 193.789               | 131.172            | 44.493                    | 42.594                    |
| PUCE_118 | 44               | <i>Leptogorgia</i> | <i>obscura</i> | NO DATA         | NO DATA            | NO DATA               | NO DATA               | NO DATA                | NO DATA                | NO DATA               | NO DATA            | 45.337                    | 41.132                    |
| PUCE_119 | 44               | <i>Leptogorgia</i> | <i>obscura</i> | NO DATA         | NO DATA            | NO DATA               | NO DATA               | NO DATA                | NO DATA                | NO DATA               | NO DATA            | 45.581                    | 41.132                    |
| PUCE_120 | 18               | <i>Leptogorgia</i> | <i>obscura</i> | NO DATA         | NO DATA            | NO DATA               | NO DATA               | 0.009                  | 0.005                  | 294.052               | 246.279            | 40.892                    | 34.968                    |

[illegible]

| Sample   | Locality Code | Genus              | Specie                      | SST WET<br>[°C] | SST DRY<br>[°C] | CHL WET<br>[mg/m³] | CHL DRY<br>[mg/m³] | PIC WET<br>[mol/m³] | PIC DRY<br>[mol/m³] | POC WET<br>[mg/m³] | POC DRY [mg/m³] | PAR WET<br>[e/m²x day] | PAR DRY<br>[e/m²x day] |
|----------|---------------|--------------------|-----------------------------|-----------------|-----------------|--------------------|--------------------|---------------------|---------------------|--------------------|-----------------|------------------------|------------------------|
| PUCE_146 | 10            | <i>Leptogorgia</i> | <i>cuspidata</i>            | 28.874          | NO DATA         | NO DATA            | NO DATA            | NO DATA             | NO DATA             | NO DATA            | NO DATA         | 38.079                 | 33.218                 |
| PUCE_147 | 10            | <i>Muricea</i>     | <i>purpurea</i>             | 28.874          | NO DATA         | NO DATA            | NO DATA            | NO DATA             | NO DATA             | NO DATA            | NO DATA         | 37.436                 | 33.218                 |
| PUCE_148 | 10            | <i>Muricea</i>     | <i>purpurea</i>             | 28.874          | NO DATA         | NO DATA            | NO DATA            | NO DATA             | NO DATA             | NO DATA            | NO DATA         | 38.079                 | 33.218                 |
| PUCE_149 | 10            | <i>Leptogorgia</i> | <i>sp1</i>                  | 27.481          | 26.560          | 1.632              | 0.754              | NO DATA             | NO DATA             | NO DATA            | NO DATA         | 37.436                 | 33.218                 |
| PUCE_150 | 5             | <i>Muricea</i>     | <i>purpurea</i>             | NO DATA         | NO DATA         | NO DATA            | NO DATA            | 0.003               | 0.004               | 300.268            | NO DATA         | 39.270                 | 35.679                 |
| PUCE_151 | 31            | <i>Leptogorgia</i> | <i>pumila</i>               | 26.265          | 24.152          | 1.123              | 0.810              | NO DATA             | NO DATA             | NO DATA            | NO DATA         | 42.690                 | 30.430                 |
| PUCE_152 | 24            | <i>Leptogorgia</i> | <i>sp2</i>                  | NO DATA         | NO DATA         | NO DATA            | NO DATA            | 0.000               | 0.001               | 161.364            | 126.943         | 43.663                 | 41.219                 |
| PUCE_153 | 24            | <i>Leptogorgia</i> | <i>sp2</i>                  | NO DATA         | NO DATA         | NO DATA            | NO DATA            | 0.000               | 0.001               | 161.364            | 126.943         | 43.663                 | 41.219                 |
| PUCE_154 | 7             | <i>Leptogorgia</i> | <i>pumila</i>               | 27.457          | 26.689          | 2.156              | 1.115              | 0.003               | 0.003               | 289.054            | 212.437         | 38.482                 | 35.601                 |
| PUCE_155 | 31            | <i>Leptogorgia</i> | <i>pumila</i>               | NO DATA         | NO DATA         | NO DATA            | NO DATA            | NO DATA             | NO DATA             | NO DATA            | NO DATA         | 42.690                 | 30.430                 |
| PUCE_156 | 31            | <i>Leptogorgia</i> | <i>alba</i>                 | NO DATA         | NO DATA         | NO DATA            | NO DATA            | NO DATA             | NO DATA             | NO DATA            | NO DATA         | 42.690                 | 30.430                 |
| PUCE_157 | 4             | <i>Leptogorgia</i> | <i>alba</i>                 | NO DATA         | NO DATA         | NO DATA            | NO DATA            | NO DATA             | NO DATA             | NO DATA            | NO DATA         | 38.666                 | 37.335                 |
| PUCE_158 | 3             | <i>Leptogorgia</i> | <i>alba</i> cf. <i>rosa</i> | NO DATA         | NO DATA         | NO DATA            | NO DATA            | NO DATA             | NO DATA             | NO DATA            | NO DATA         | 38.771                 | 40.473                 |
| PUCE_159 | 3             | <i>Leptogorgia</i> | <i>alba</i> cf. <i>rosa</i> | NO DATA         | NO DATA         | NO DATA            | NO DATA            | NO DATA             | NO DATA             | NO DATA            | NO DATA         | 38.771                 | 40.473                 |
| PUCE_160 | 4             | <i>Leptogorgia</i> | <i>alba</i> cf. <i>rosa</i> | NO DATA         | NO DATA         | NO DATA            | NO DATA            | NO DATA             | NO DATA             | NO DATA            | NO DATA         | 38.666                 | 37.335                 |
| PUCE_161 | 31            | <i>Muricea</i>     | <i>purpurea</i>             | 26.265          | 24.152          | 1.123              | 0.810              | NO DATA             | NO DATA             | NO DATA            | NO DATA         | 42.690                 | 30.430                 |
| PUCE_162 | 8             | <i>Muricea</i>     | <i>purpurea</i>             | 27.457          | 26.689          | 2.156              | 1.115              | NO DATA             | NO DATA             | NO DATA            | NO DATA         | 37.590                 | 35.601                 |
| PUCE_163 | 37            | <i>Muricea</i>     | <i>purpurea</i>             | 26.774          | 23.466          | NO DATA            | NO DATA            | NO DATA             | NO DATA             | NO DATA            | NO DATA         | 44.283                 | 29.581                 |
| PUCE_164 | 13            | <i>Muricea</i>     | <i>purpurea</i>             | 27.514          | 26.399          | NO DATA            | NO DATA            | 0.001               | NO DATA             | 185.327            | NO DATA         | 39.739                 | 35.046                 |
| PUCE_165 | 31            | <i>Muricea</i>     | <i>purpurea</i>             | 26.265          | 24.152          | 1.123              | 0.810              | NO DATA             | NO DATA             | NO DATA            | NO DATA         | 42.690                 | 30.430                 |
| PUCE_166 | 14            | <i>Muricea</i>     | <i>purpurea</i>             | 27.514          | 26.399          | NO DATA            | NO DATA            | NO DATA             | NO DATA             | NO DATA            | NO DATA         | 39.130                 | 32.403                 |
| PUCE_167 | 7             | <i>Muricea</i>     | <i>purpurea</i>             | 27.457          | 26.689          | 2.156              | 1.115              | 0.003               | 0.003               | 289.054            | 212.437         | 38.482                 | 35.679                 |
| PUCE_168 | 31            | <i>Muricea</i>     | <i>purpurea</i>             | 26.265          | 24.152          | 1.123              | 0.810              | NO DATA             | NO DATA             | NO DATA            | NO DATA         | 42.690                 | 30.430                 |
| PUCE_169 | 31            | <i>Muricea</i>     | <i>purpurea</i>             | 26.265          | 24.152          | 1.123              | 0.810              | NO DATA             | NO DATA             | NO DATA            | NO DATA         | 42.690                 | 30.430                 |
| PUCE_170 | 35            | <i>Muricea</i>     | <i>purpurea</i>             | 26.306          | 23.819          | NO DATA            | NO DATA            | 0.000               | 0.000               | 147.151            | 133.714         | 44.623                 | 25.571                 |

| Sample   | Locality Code | Genus          | Specie          | SST WET<br>[°C] | SST DRY<br>[°C] | CHL WET<br>[mg/m³] | CHL DRY<br>[mg/m³] | PIC WET<br>[mol/m³] | PIC DRY<br>[mol/m³] | POC WET<br>[mg/m³] | POC DRY [mg/m³] | PAR WET<br>[e/m²x day] | PAR DRY<br>[e/m²x day] |
|----------|---------------|----------------|-----------------|-----------------|-----------------|--------------------|--------------------|---------------------|---------------------|--------------------|-----------------|------------------------|------------------------|
| PUCE_171 | 34            | <i>Muricea</i> | <i>purpurea</i> | NO DATA         | NO DATA         | NO DATA            | NO DATA            | NO DATA             | NO DATA             | NO DATA            | NO DATA         | 44.276                 | 27.799                 |
| PUCE_172 | 12            | <i>Muricea</i> | <i>purpurea</i> | 27.514          | 26.399          | NO DATA            | NO DATA            | 0.001               | NO DATA             | 185.327            | NO DATA         | 39.739                 | 35.046                 |
| PUCE_173 | 8             | <i>Muricea</i> | <i>purpurea</i> | 27.457          | 26.689          | 2.156              | 1.115              | 0.002               | 0.003               | 281.875            | 207.060         | 38.666                 | 35.601                 |
| PUCE_174 | 36            | <i>Muricea</i> | <i>purpurea</i> | 27.455          | 21.653          | NO DATA            | NO DATA            | 0.000               | NO DATA             | 132.878            | NO DATA         | 42.744                 | 25.903                 |
| PUCE_175 | 31            | <i>Muricea</i> | <i>purpurea</i> | 26.265          | 24.152          | 1.123              | 0.810              | NO DATA             | NO DATA             | NO DATA            | NO DATA         | 42.690                 | 30.430                 |
| PUCE_176 | 31            | <i>Muricea</i> | <i>purpurea</i> | 26.265          | 24.152          | 1.123              | 0.810              | 0.000               | NO DATA             | 177.517            | NO DATA         | 43.406                 | 31.885                 |
| PUCE_177 | 31            | <i>Muricea</i> | <i>purpurea</i> | 26.265          | 24.152          | 1.123              | 0.810              | NO DATA             | NO DATA             | NO DATA            | NO DATA         | 42.690                 | 30.430                 |
| PUCE_178 | 34            | <i>Muricea</i> | <i>purpurea</i> | NO DATA         | NO DATA         | NO DATA            | NO DATA            | NO DATA             | NO DATA             | NO DATA            | NO DATA         | 44.057                 | 27.799                 |
| PUCE_179 | 8             | <i>Muricea</i> | <i>purpurea</i> | 27.457          | 26.689          | 2.156              | 1.115              | NO DATA             | NO DATA             | NO DATA            | NO DATA         | 37.590                 | 35.601                 |
| PUCE_180 | 34            | <i>Muricea</i> | <i>purpurea</i> | NO DATA         | NO DATA         | NO DATA            | NO DATA            | NO DATA             | NO DATA             | NO DATA            | NO DATA         | 44.057                 | 27.799                 |
| PUCE_181 | 7             | <i>Muricea</i> | <i>purpurea</i> | 27.457          | 26.689          | 2.156              | 1.115              | 0.003               | 0.003               | 289.054            | 212.437         | 38.482                 | 35.679                 |
| PUCE_182 | 37            | <i>Muricea</i> | <i>purpurea</i> | 26.774          | 23.466          | NO DATA            | NO DATA            | NO DATA             | NO DATA             | NO DATA            | NO DATA         | 44.283                 | 29.581                 |
| PUCE_183 | 9             | <i>Muricea</i> | <i>purpurea</i> | 27.481          | 26.560          | 1.632              | 0.754              | NO DATA             | NO DATA             | NO DATA            | NO DATA         | 37.436                 | 33.218                 |
| PUCE_184 | 5             | <i>Muricea</i> | <i>purpurea</i> | NO DATA         | NO DATA         | NO DATA            | NO DATA            | 0.003               | 0.004               | 294.821            | NO DATA         | 39.412                 | 35.679                 |
| PUCE_185 | 31            | <i>Muricea</i> | <i>purpurea</i> | 26.265          | 24.152          | 1.123              | 0.810              | NO DATA             | NO DATA             | NO DATA            | NO DATA         | 42.690                 | 30.430                 |
| PUCE_186 | 33            | <i>Muricea</i> | <i>purpurea</i> | 26.180          | 24.316          | NO DATA            | NO DATA            | NO DATA             | NO DATA             | NO DATA            | NO DATA         | NO DATA                | 32.398                 |
| PUCE_187 | 17            | <i>Muricea</i> | <i>purpurea</i> | NO DATA         | NO DATA         | NO DATA            | NO DATA            | 0.001               | 0.001               | 203.831            | 135.649         | 40.052                 | 32.100                 |
| PUCE_188 | 36            | <i>Muricea</i> | <i>purpurea</i> | 27.455          | 21.653          | NO DATA            | NO DATA            | 0.000               | NO DATA             | 132.878            | NO DATA         | 42.744                 | 25.903                 |
| PUCE_189 | 8             | <i>Muricea</i> | <i>purpurea</i> | 27.457          | 26.689          | 2.156              | 1.115              | 0.003               | 0.003               | 289.054            | 212.437         | 38.482                 | 35.601                 |
| PUCE_190 | 8             | <i>Muricea</i> | <i>purpurea</i> | 27.457          | 26.689          | 2.156              | 1.115              | 0.003               | 0.003               | 289.054            | 212.437         | 38.482                 | 35.679                 |
| PUCE_191 | 31            | <i>Muricea</i> | <i>purpurea</i> | 26.265          | 24.152          | 1.123              | 0.810              | NO DATA             | NO DATA             | NO DATA            | NO DATA         | 42.690                 | 30.430                 |
| PUCE_192 | 18            | <i>Muricea</i> | <i>purpurea</i> | NO DATA         | NO DATA         | NO DATA            | NO DATA            | 0.009               | 0.005               | 294.052            | 246.279         | 40.892                 | 34.968                 |
| PUCE_193 | 31            | <i>Muricea</i> | sp1             | 26.265          | 24.152          | 1.123              | 0.810              | NO DATA             | NO DATA             | NO DATA            | NO DATA         | 42.690                 | 30.430                 |
| PUCE_194 | 24            | <i>Muricea</i> | sp1             | NO DATA         | NO DATA         | NO DATA            | NO DATA            | 0.000               | 0.001               | 161.364            | 126.943         | 43.663                 | 41.219                 |
| PUCE_195 | 31            | <i>Muricea</i> | sp1             | 26.265          | 24.152          | 1.123              | 0.810              | NO DATA             | NO DATA             | NO DATA            | NO DATA         | 42.690                 | 30.430                 |

| Sample   | Locality Code | Genus          | Specie           | SST WET<br>[°C] | SST DRY<br>[°C] | CHL WET<br>[mg/m³] | CHL DRY<br>[mg/m³] | PIC WET<br>[mol/m³] | PIC DRY<br>[mol/m³] | POC WET<br>[mg/m³] | POC DRY [mg/m³] | PAR WET<br>[e/m²x day] | PAR DRY<br>[e/m²x day] |
|----------|---------------|----------------|------------------|-----------------|-----------------|--------------------|--------------------|---------------------|---------------------|--------------------|-----------------|------------------------|------------------------|
| PUCE_196 | 31            | <i>Muricea</i> | sp1              | 26.265          | 24.152          | 1.123              | 0.810              | 0.000               | NO DATA             | 177.517            | NO DATA         | 43.406                 | 31.885                 |
| PUCE_197 | 31            | <i>Muricea</i> | sp1              | 26.265          | 24.152          | 1.123              | 0.810              | NO DATA             | NO DATA             | NO DATA            | NO DATA         | 42.690                 | 30.430                 |
| PUCE_198 | 14            | <i>Muricea</i> | <i>fruticosa</i> | 27.514          | 26.399          | NO DATA            | NO DATA            | NO DATA             | NO DATA             | NO DATA            | NO DATA         | 38.565                 | 32.084                 |
| PUCE_199 | 42            | <i>Muricea</i> | <i>fruticosa</i> | 25.958          | 23.735          | 1.476              | 1.155              | 0.001               | 0.001               | 215.450            | 198.700         | 48.231                 | 36.093                 |
| PUCE_200 | 18            | <i>Muricea</i> | <i>fruticosa</i> | NO DATA         | NO DATA         | NO DATA            | NO DATA            | 0.009               | 0.005               | 294.052            | 246.279         | 40.892                 | 34.968                 |
| PUCE_201 | 27            | <i>Muricea</i> | <i>fruticosa</i> | 26.390          | 24.920          | 1.573              | 0.629              | 0.001               | 0.001               | 199.325            | 139.540         | 44.249                 | 42.604                 |
| PUCE_202 | 31            | <i>Muricea</i> | <i>fruticosa</i> | 26.265          | 24.152          | 1.123              | 0.810              | 0.000               | NO DATA             | 177.517            | NO DATA         | 43.406                 | 31.885                 |
| PUCE_203 | 14            | <i>Muricea</i> | <i>fruticosa</i> | 27.514          | 26.399          | NO DATA            | NO DATA            | NO DATA             | NO DATA             | NO DATA            | NO DATA         | 38.565                 | 32.084                 |
| PUCE_204 | 10            | <i>Muricea</i> | <i>fruticosa</i> | 28.874          | NO DATA         | NO DATA            | NO DATA            | NO DATA             | NO DATA             | NO DATA            | NO DATA         | 38.079                 | 33.218                 |
| PUCE_205 | 31            | <i>Muricea</i> | <i>fruticosa</i> | 26.265          | 24.152          | 1.123              | 0.810              | 0.000               | NO DATA             | 177.517            | NO DATA         | 43.406                 | 31.885                 |
| PUCE_206 | 31            | <i>Muricea</i> | <i>fruticosa</i> | 26.265          | 24.152          | 1.123              | 0.810              | 0.000               | NO DATA             | 177.517            | NO DATA         | 43.406                 | 31.885                 |
| PUCE_207 | 18            | <i>Muricea</i> | <i>fruticosa</i> | NO DATA         | NO DATA         | NO DATA            | NO DATA            | 0.009               | 0.005               | 294.052            | 246.279         | 40.892                 | 34.968                 |
| PUCE_208 | 8             | <i>Muricea</i> | <i>fruticosa</i> | 27.457          | 26.689          | 2.156              | 1.115              | NO DATA             | NO DATA             | NO DATA            | NO DATA         | 37.590                 | 35.601                 |
| PUCE_209 | 42            | <i>Muricea</i> | <i>fruticosa</i> | 25.958          | 23.735          | 1.476              | 1.155              | 0.001               | 0.001               | 215.450            | 198.700         | 48.231                 | 36.093                 |
| PUCE_210 | 14            | <i>Muricea</i> | <i>fruticosa</i> | 27.514          | 26.399          | NO DATA            | NO DATA            | NO DATA             | NO DATA             | NO DATA            | NO DATA         | 38.565                 | 32.084                 |
| PUCE_211 | 18            | <i>Muricea</i> | <i>fruticosa</i> | NO DATA         | NO DATA         | NO DATA            | NO DATA            | 0.009               | 0.005               | 294.052            | 246.279         | 40.892                 | 34.968                 |
| PUCE_212 | 18            | <i>Muricea</i> | <i>fruticosa</i> | NO DATA         | NO DATA         | NO DATA            | NO DATA            | 0.009               | 0.005               | 294.052            | 246.279         | 40.892                 | 34.968                 |
| PUCE_213 | 8             | <i>Muricea</i> | <i>fruticosa</i> | 27.457          | 26.689          | 2.156              | 1.115              | 0.003               | 0.003               | 289.054            | 212.437         | 38.482                 | 35.679                 |
| PUCE_214 | 8             | <i>Muricea</i> | <i>fruticosa</i> | 27.457          | 26.689          | 2.156              | 1.115              | NO DATA             | NO DATA             | NO DATA            | NO DATA         | 37.590                 | 35.601                 |
| PUCE_215 | 9             | <i>Muricea</i> | <i>fruticosa</i> | 27.481          | 26.560          | 1.632              | 0.754              | NO DATA             | NO DATA             | NO DATA            | NO DATA         | 37.436                 | 33.218                 |
| PUCE_216 | 31            | <i>Muricea</i> | <i>fruticosa</i> | 26.265          | 24.152          | 1.123              | 0.810              | 0.000               | NO DATA             | 177.517            | NO DATA         | 43.406                 | 31.885                 |
| PUCE_217 | 35            | <i>Muricea</i> | <i>fruticosa</i> | 26.306          | 23.819          | NO DATA            | NO DATA            | 0.000               | 0.000               | 147.151            | 133.714         | 44.623                 | 27.195                 |
| PUCE_218 | 31            | <i>Muricea</i> | <i>fruticosa</i> | 26.265          | 24.152          | 1.123              | 0.810              | 0.000               | NO DATA             | 177.517            | NO DATA         | 43.406                 | 31.885                 |
| PUCE_219 | 31            | <i>Muricea</i> | <i>fruticosa</i> | 26.265          | 24.152          | 1.123              | 0.810              | 0.000               | NO DATA             | 177.517            | NO DATA         | 43.406                 | 31.885                 |
| PUCE_220 | 42            | <i>Muricea</i> | <i>fruticosa</i> | 25.958          | 23.735          | 1.476              | 1.155              | 0.001               | 0.001               | 215.450            | 198.700         | 48.231                 | 36.093                 |

| Sample   | Locality Code | Genus              | Specie             | SST WET<br>[°C] | SST DRY<br>[°C] | CHL WET<br>[mg/m³] | CHL DRY<br>[mg/m³] | PIC WET<br>[mol/m³] | PIC DRY<br>[mol/m³] | POC WET<br>[mg/m³] | POC DRY [mg/m³] | PAR WET<br>[e/m²x day] | PAR DRY<br>[e/m²x day] |
|----------|---------------|--------------------|--------------------|-----------------|-----------------|--------------------|--------------------|---------------------|---------------------|--------------------|-----------------|------------------------|------------------------|
| PUCE_221 | 44            | <i>Muricea</i>     | <i>fruticosa</i>   | NO DATA         | NO DATA         | NO DATA            | NO DATA            | NO DATA             | NO DATA             | NO DATA            | NO DATA         | 45.581                 | 41.132                 |
| PUCE_222 | 31            | <i>Muricea</i>     | <i>fruticosa</i>   | 26.265          | 24.152          | 1.123              | 0.810              | 0.000               | NO DATA             | 177.517            | NO DATA         | 43.406                 | 31.885                 |
| PUCE_223 | 31            | <i>Muricea</i>     | <i>fruticosa</i>   | 26.265          | 24.152          | 1.123              | 0.810              | 0.000               | NO DATA             | 177.517            | NO DATA         | 43.406                 | 31.885                 |
| PUCE_224 | 18            | <i>Muricea</i>     | <i>fruticosa</i>   | NO DATA         | NO DATA         | NO DATA            | NO DATA            | 0.009               | 0.005               | 294.052            | 246.279         | 40.892                 | 34.968                 |
| PUCE_225 | 18            | <i>Muricea</i>     | <i>fruticosa</i>   | NO DATA         | NO DATA         | NO DATA            | NO DATA            | 0.009               | 0.005               | 294.052            | 246.279         | 40.892                 | 34.968                 |
| PUCE_226 | 31            | <i>Muricea</i>     | <i>fruticosa</i>   | NO DATA         | NO DATA         | NO DATA            | NO DATA            | NO DATA             | NO DATA             | NO DATA            | NO DATA         | 42.690                 | 30.430                 |
| PUCE_227 | 24            | <i>Muricea</i>     | <i>fruticosa</i>   | NO DATA         | NO DATA         | NO DATA            | NO DATA            | 0.000               | 0.001               | 161.364            | 126.943         | 43.663                 | 41.219                 |
| PUCE_228 | 20            | <i>Muricea</i>     | <i>fruticosa</i>   | NO DATA         | NO DATA         | NO DATA            | NO DATA            | 0.003               | 0.006               | 271.154            | 255.646         | 41.981                 | 32.917                 |
| PUCE_229 | 24            | <i>Muricea</i>     | <i>fruticosa</i>   | NO DATA         | NO DATA         | NO DATA            | NO DATA            | 0.000               | 0.001               | 161.364            | 126.943         | 43.663                 | 41.219                 |
| PUCE_230 | 36            | <i>Muricea</i>     | <i>fruticosa</i>   | 27.455          | 21.653          | NO DATA            | NO DATA            | 0.000               | NO DATA             | 132.878            | NO DATA         | 42.744                 | 25.903                 |
| PUCE_231 | 18            | <i>Muricea</i>     | <i>fruticosa</i>   | NO DATA         | NO DATA         | NO DATA            | NO DATA            | 0.009               | 0.005               | 294.052            | 246.279         | 40.892                 | 34.968                 |
| PUCE_232 | 36            | <i>Muricea</i>     | <i>crassa</i>      | 27.455          | 21.653          | NO DATA            | NO DATA            | 0.000               | NO DATA             | 132.878            | NO DATA         | 42.744                 | 25.903                 |
| PUCE_233 | 2             | <i>Muricea</i>     | <i>squarrosa</i>   | 28.186          | 27.550          | 3.239              | 1.454              | 0.005               | 0.006               | 471.453            | 313.914         | 42.467                 | 41.431                 |
| PUCE_234 | 37            | <i>Muricea</i>     | <i>plantaginea</i> | 26.774          | 23.466          | NO DATA            | NO DATA            | NO DATA             | NO DATA             | NO DATA            | NO DATA         | 44.283                 | 29.581                 |
| PUCE_235 | 44            | <i>Muricea</i>     | <i>plantaginea</i> | NO DATA         | NO DATA         | NO DATA            | NO DATA            | NO DATA             | NO DATA             | NO DATA            | NO DATA         | 45.894                 | 41.132                 |
| PUCE_236 | 2             | <i>Muricea</i>     | <i>squarrosa</i>   | 28.186          | 27.550          | 3.239              | 1.454              | 0.005               | 0.006               | 471.453            | 313.914         | 42.467                 | 41.431                 |
| PUCE_237 | 18            | <i>Muricea</i>     | <i>squarrosa</i>   | NO DATA         | NO DATA         | NO DATA            | NO DATA            | 0.009               | 0.005               | 294.052            | 246.279         | 40.892                 | 34.968                 |
| PUCE_238 | 18            | <i>Muricea</i>     | <i>crassa</i>      | NO DATA         | NO DATA         | NO DATA            | NO DATA            | 0.010               | 0.006               | 302.005            | 254.867         | 40.803                 | 34.968                 |
| PUCE_239 | 42            | <i>Leptogorgia</i> | <i>taboguilla</i>  | 25.958          | 23.735          | 1.476              | 1.155              | 0.001               | 0.001               | 215.450            | 198.700         | 48.231                 | 36.093                 |
| PUCE_240 | 5             | <i>Leptogorgia</i> | <i>taboguilla</i>  | NO DATA         | NO DATA         | NO DATA            | NO DATA            | 0.003               | 0.004               | 297.390            | NO DATA         | 38.211                 | 35.679                 |
| PUCE_241 | 13            | <i>Leptogorgia</i> | <i>cuspidata</i>   | 27.514          | 26.399          | NO DATA            | NO DATA            | 0.001               | NO DATA             | 185.327            | NO DATA         | 39.739                 | 35.046                 |
| PUCE_242 | 8             | <i>Leptogorgia</i> | <i>cuspidata</i>   | 27.457          | 26.689          | 2.156              | 1.115              | NO DATA             | NO DATA             | NO DATA            | NO DATA         | 37.590                 | 35.601                 |
| PUCE_243 | 31            | <i>Leptogorgia</i> | <i>cuspidata</i>   | NO DATA         | NO DATA         | NO DATA            | NO DATA            | NO DATA             | NO DATA             | NO DATA            | NO DATA         | 42.690                 | 30.430                 |
| CENAIM_1 | 38            | <i>Muricea</i>     | <i>squarrosa</i>   | 26.230          | 23.962          | 1.043              | 0.761              | 0.000               | 0.000               | 156.641            | 135.942         | 46.276                 | 35.072                 |
| CENAIM_2 | 38            | <i>Muricea</i>     | <i>plantaginea</i> | 26.230          | 23.962          | 1.043              | 0.761              | 0.000               | 0.000               | 156.641            | 135.942         | 46.276                 | 35.072                 |

| Sample    | Locality Code | Genus              | Specie                     | SST WET<br>[°C] | SST DRY<br>[°C] | CHL WET<br>[mg/m³] | CHL DRY<br>[mg/m³] | PIC WET<br>[mol/m³] | PIC DRY<br>[mol/m³] | POC WET<br>[mg/m³] | POC DRY [mg/m³] | PAR WET<br>[e/m²x day] | PAR DRY<br>[e/m²x day] |
|-----------|---------------|--------------------|----------------------------|-----------------|-----------------|--------------------|--------------------|---------------------|---------------------|--------------------|-----------------|------------------------|------------------------|
| CENAIM_3  | 38            | <i>Muricea</i>     | <i>fruticosa</i>           | 26.230          | 23.962          | 1.043              | 0.761              | 0.000               | 0.000               | 156.641            | 135.942         | 46.276                 | 35.072                 |
| CENAIM_4  | 38            | <i>Muricea</i>     | <i>austera</i>             | 26.230          | 23.962          | 1.043              | 0.761              | 0.000               | 0.000               | 156.641            | 135.942         | 46.276                 | 35.072                 |
| CENAIM_5  | 38            | <i>Muricea</i>     | <i>purpurea</i>            | 26.230          | 23.962          | 1.043              | 0.761              | 0.000               | 0.000               | 156.641            | 135.942         | 46.276                 | 35.072                 |
| CENAIM_6  | 38            | <i>Leptogorgia</i> | <i>taboguilla</i>          | 26.230          | 23.962          | 1.043              | 0.761              | 0.000               | 0.000               | 156.641            | 135.942         | 46.276                 | 35.072                 |
| CENAIM_7  | 38            | <i>Leptogorgia</i> | <i>alba</i>                | 26.230          | 23.962          | 1.043              | 0.761              | 0.000               | 0.000               | 156.641            | 135.942         | 46.276                 | 35.072                 |
| CENAIM_8  | 38            | <i>Muricea</i>     | <i>crassa</i>              | 26.230          | 23.962          | 1.043              | 0.761              | 0.000               | 0.000               | 156.641            | 135.942         | 46.276                 | 35.072                 |
| CENAIM_9  | 38            | <i>Leptogorgia</i> | <i>alba</i> cf <i>rosa</i> | 26.230          | 23.962          | 1.043              | 0.761              | 0.000               | 0.000               | 156.641            | 135.942         | 46.276                 | 35.072                 |
| CENAIM_10 | 41            | <i>Leptogorgia</i> | <i>obscura</i>             | 26.230          | 23.962          | 1.043              | 0.761              | 0.000               | 0.000               | 156.641            | 135.942         | 46.276                 | 35.072                 |
| CENAIM_11 | 39            | <i>Leptogorgia</i> | <i>pumila</i>              | 26.230          | 23.962          | 1.043              | 0.761              | 0.000               | 0.000               | 156.641            | 135.942         | 46.276                 | 35.072                 |
| CENAIM_12 | 39            | <i>Leptogorgia</i> | <i>cuspidata</i>           | 26.230          | 23.962          | 1.043              | 0.761              | 0.000               | 0.000               | 156.641            | 135.942         | 46.276                 | 35.072                 |
| CENAIM_13 | 38            | <i>Leptogorgia</i> | <i>obscura</i>             | NO DATA         | NO DATA         | NO DATA            | NO DATA            | 0.000               | 0.001               | 177.034            | 156.450         | 45.852                 | 35.677                 |
| CENAIM_14 | 38            | <i>Leptogorgia</i> | <i>pumila</i>              | NO DATA         | NO DATA         | NO DATA            | NO DATA            | 0.000               | 0.001               | 177.034            | 156.450         | 45.852                 | 35.677                 |
| CENAIM_15 | 38            | <i>Muricea</i>     | <i>purpurea</i>            | NO DATA         | NO DATA         | NO DATA            | NO DATA            | 0.000               | 0.001               | 177.034            | 156.450         | 45.852                 | 35.677                 |
| CENAIM_16 | 38            | <i>Leptogorgia</i> | <i>cuspidata</i>           | NO DATA         | NO DATA         | NO DATA            | NO DATA            | NO DATA             | NO DATA             | NO DATA            | NO DATA         | 46.308                 | 37.758                 |
| CENAIM_17 | 38            | <i>Muricea</i>     | <i>hebes</i>               | 26.230          | 23.962          | 1.043              | 0.761              | 0.000               | 0.000               | 156.641            | 135.942         | 46.276                 | 35.072                 |
| PUCE_244  | 31            | <i>Muricea</i>     | <i>hebes</i>               | NO DATA         | NO DATA         | NO DATA            | NO DATA            | NO DATA             | NO DATA             | NO DATA            | NO DATA         | 42.690                 | 30.430                 |
| PUCE_245  | 31            | <i>Muricea</i>     | <i>hebes</i>               | NO DATA         | NO DATA         | NO DATA            | NO DATA            | NO DATA             | NO DATA             | NO DATA            | NO DATA         | 42.690                 | 30.430                 |
| PUCE_246  | 36            | <i>Muricea</i>     | <i>plantaginea</i>         | 27.455          | 21.653          | NO DATA            | NO DATA            | 0.000               | NO DATA             | 132.878            | NO DATA         | 42.744                 | 27.179                 |
| PUCE_247  | 34            | <i>Muricea</i>     | <i>plantaginea</i>         | NO DATA         | NO DATA         | NO DATA            | NO DATA            | NO DATA             | NO DATA             | NO DATA            | NO DATA         | 44.057                 | 27.799                 |
| PUCE_248  | 20            | <i>Muricea</i>     | <i>plantaginea</i>         | NO DATA         | NO DATA         | NO DATA            | NO DATA            | 0.003               | 0.006               | 273.051            | 259.627         | 41.957                 | 33.085                 |
| PUCE_249  | 37            | <i>Muricea</i>     | <i>plantaginea</i>         | 26.774          | 23.466          | NO DATA            | NO DATA            | NO DATA             | NO DATA             | NO DATA            | NO DATA         | 44.515                 | 29.581                 |
| PUCE_250  | 18            | <i>Muricea</i>     | <i>plantaginea</i>         | NO DATA         | NO DATA         | NO DATA            | NO DATA            | 0.010               | 0.006               | 302.005            | 254.867         | 40.803                 | 34.968                 |
| PUCE_251  | 37            | <i>Muricea</i>     | <i>plantaginea</i>         | 26.774          | 23.466          | NO DATA            | NO DATA            | NO DATA             | NO DATA             | NO DATA            | NO DATA         | 44.283                 | 29.581                 |
| PUCE_252  | 21            | <i>Muricea</i>     | <i>plantaginea</i>         | 27.228          | 25.415          | NO DATA            | NO DATA            | NO DATA             | NO DATA             | NO DATA            | NO DATA         | 40.507                 | 36.872                 |
| PUCE_253  | 40            | <i>Muricea</i>     | <i>plantaginea</i>         | 26.230          | 23.962          | 1.043              | 0.761              | 0.000               | 0.001               | 177.034            | 156.450         | 45.852                 | 36.878                 |

| Sample   | Locality<br>Code | Genus          | Specie             | SST WET<br>[°C] | SST<br>DRY<br>[°C] | CHL<br>WET<br>[mg/m³] | CHL<br>DRY<br>[mg/m³] | PIC<br>WET<br>[mol/m³] | PIC<br>DRY<br>[mol/m³] | POC<br>WET<br>[mg/m³] | POC<br>DRY [mg/m³] | PAR<br>WET<br>[e/m²x day] | PAR<br>DRY<br>[e/m²x day] |
|----------|------------------|----------------|--------------------|-----------------|--------------------|-----------------------|-----------------------|------------------------|------------------------|-----------------------|--------------------|---------------------------|---------------------------|
| PUCE_254 | 21               | <i>Muricea</i> | <i>plantaginea</i> | 27.228          | 25.415             | NO DATA               | NO DATA               | NO DATA                | NO DATA                | NO DATA               | NO DATA            | 40.507                    | 36.872                    |
| PUCE_255 | 18               | <i>Muricea</i> | <i>plantaginea</i> | NO DATA         | NO DATA            | NO DATA               | NO DATA               | 0.010                  | 0.006                  | 302.005               | 254.867            | 40.803                    | 34.968                    |
| PUCE_256 | 30               | <i>Muricea</i> | <i>plantaginea</i> | 25.918          | 24.222             | 0.897                 | 0.539                 | 0.000                  | 0.000                  | 136.434               | 112.452            | 47.274                    | 34.375                    |

Supplementary Table S5

Pearson Correlation Coefficient method applied to the environmental variables in the study. The variables marked (\*) are the selected for the further analyses.

|     | SST*   | CHL*   | PIC    | POC    | PAR*  |
|-----|--------|--------|--------|--------|-------|
| SST | 1.000  |        |        |        |       |
| CHL | 0.905  | 1.000  |        |        |       |
| PIC | 0.949  | 0.984  | 1.000  |        |       |
| POC | 0.877  | 0.991  | 0.981  | 1.000  |       |
| PAR | -0.591 | -0.383 | -0.459 | -0.312 | 1.000 |

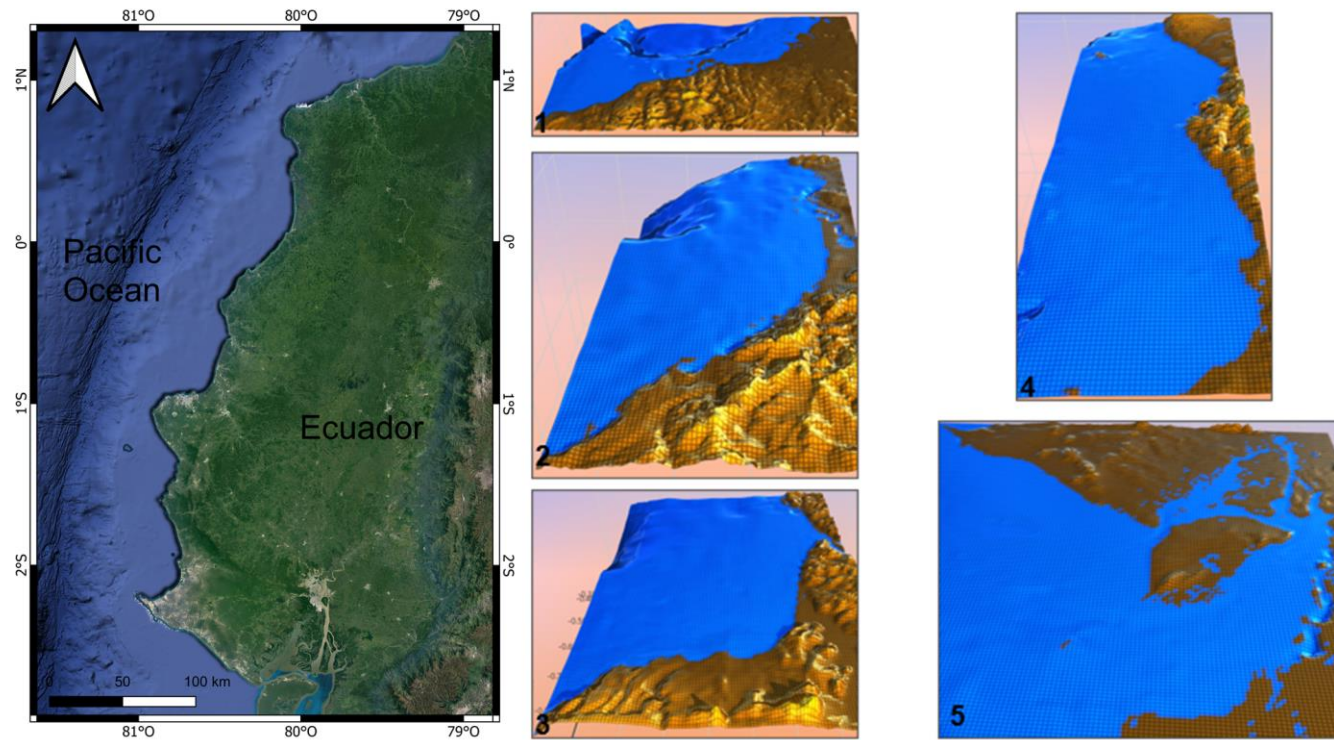

**Supplementary Figure S1.** Tridimensionality map of the five macrozones of the Equatorial Front considering the orography and submarine slopes of the coastline in a three-dimensional diagram. Source: Observational Geoportal (GEOOs).

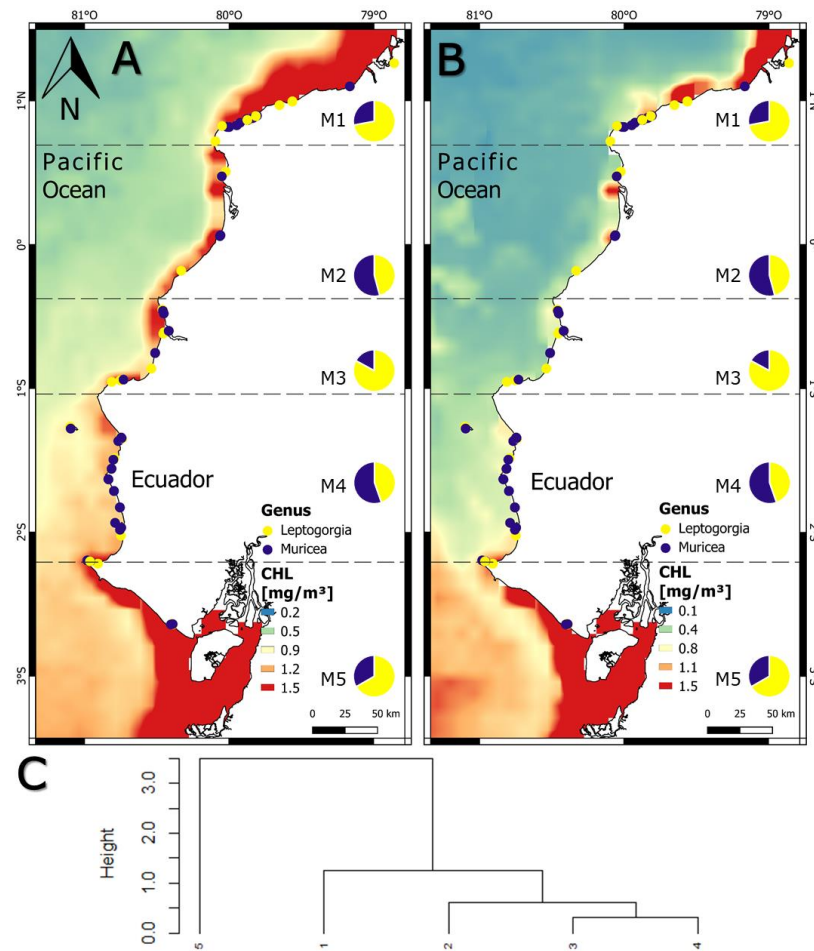

**Supplementary Figure S2.** Chlorophyll-a concentration map (CHL-a) in  $\text{mg}/\text{m}^3$  represented in a scale from blue (less concentration) to red (high concentration) the corresponding distribution of *Leptogorgia* species (yellow) and *Muricea* species (blue) **A.** Chlorophyll-a concentration in the wet season (December - May). **B.** Chlorophyll-a concentration in the dry season (June - November). **C.** CHL-a Cluster dendrogram determined by macrozone. The height values represent the similarity values between each macrozone.

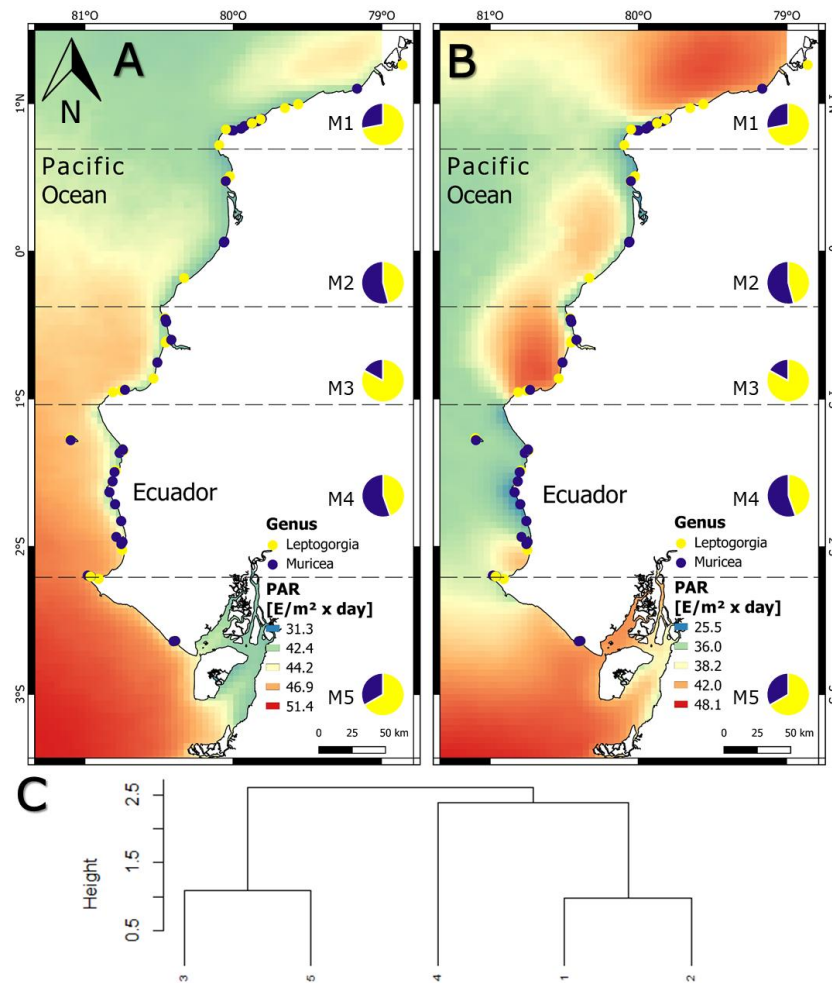

**Supplementary Figure S3.** Photosynthetically Active Radiation map (PAR) in  $\text{E}/(\text{m}^2/\text{day})$  represented in a scale from blue (less incidence) to red (high incidence) and the corresponding distribution of *Leptogorgia* species (yellow) and *Muricea* species (blue). **A.** PAR radiation in the wet season (December - May). **B.** PAR radiation in the dry season (June - November). **C.** PAR Cluster dendrogram determined by macrozone. The height values represent the similarity values between each macrozone.

#### REFERENCES:

1. Valle, M.; Fuentes, M. Estudios de Caracterización del Mar Territorial Continental del Ecuador, Bases para lograr la zonificación marina. Estudio 4: Distribución y Variación de los valores de productividad primaria (fitoplacton) y secundaria (zooplacton), a dos profundidades, en el mar territorial y aguas interiores de la Plataforma Continental del Ecuador; Secretaria Técnica del Mar: SPINCAM Publications, Ecuador, 2014; p. 150.
2. Breedy, O.; Guzman, H.M. A revision of the genus *Muricea* Lamouroux, 1821 (Anthozoa, Octocorallia) in the eastern Pacific. Part II. *Zookeys* **2016**, 1-69, [10.3897/zookeys.581.7910].
3. Breedy, O.; Guzman, H.M. A revision of the genus *Muricea* Lamouroux, 1821 (Anthozoa, Octocorallia) in the eastern Pacific. Part I: *Eumuricea* Verrill, 1869 revisited. *Zookeys* **2015**, 1-32, [10.3897/zookeys.537.6025].
4. Breedy, O.; Guzman, H.M. A revision of the genus *Leptogorgia* Milne Edwards & Haime, 1857 (Coelenterata : Octocorallia : Gorgoniidae) in the eastern Pacific. *Zootaxa* **2007**, 1419, 1-90, [10.11646/zootaxa.1419.1.1].
